# Supplementary material for: Maturation of heart valve cell populations during postnatal remodeling
Source: Oxford University Press journal article supplement (doi:10.1242/dev.173047), 2019-02-22
Supplement: dev173047supp.pdf [file dev173047supp.pdf]

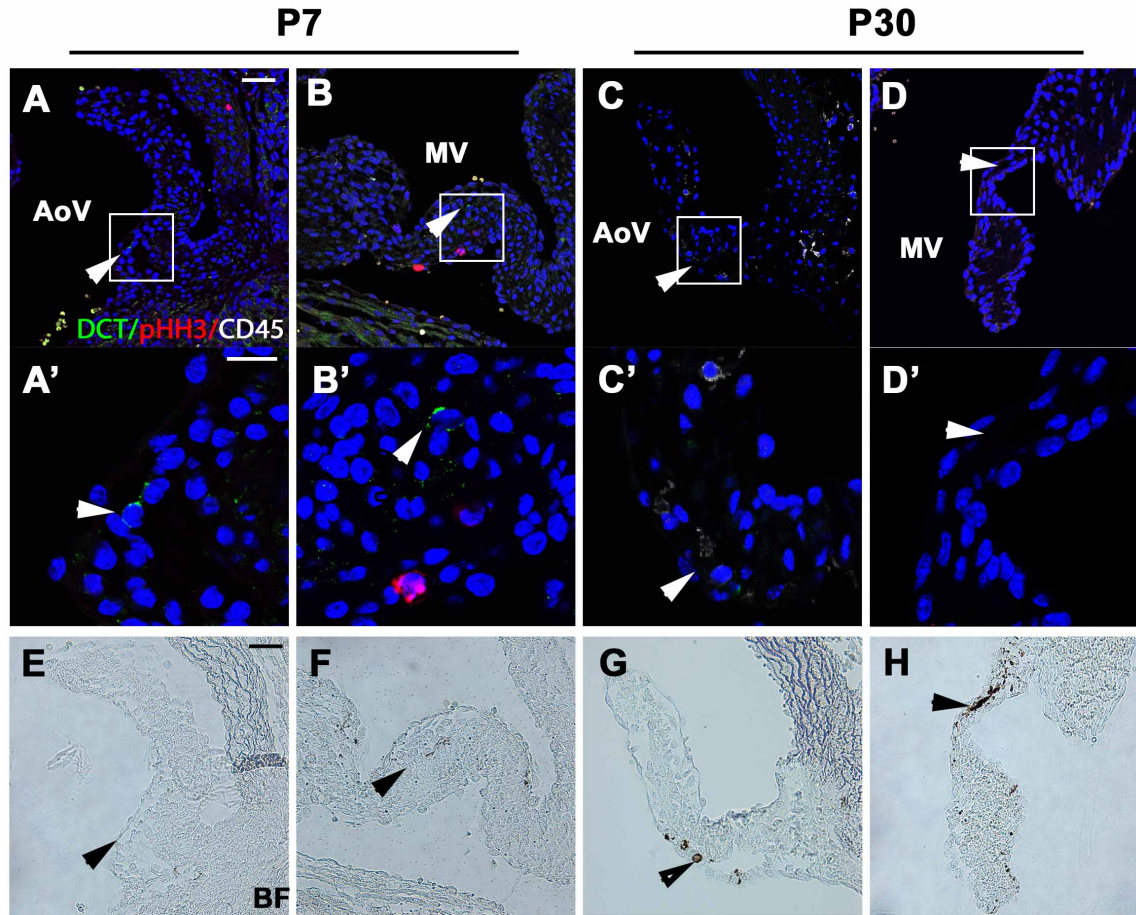

**Figure S1. Melanocytes are present in P7 and P30 AoV and MV leaflets.** **A-D:** Representative Dct, pHH3 and CD45 staining on P7 AoV (A), P7 MV (B), P30 AoV (C) and P30 MV (D) leaflet sections. **A'-D':** higher magnification with white arrows pointing to a melanocyte positive for Dct (A',B') or in regions forming melanin (C'-D') as shown in bright field (G,H). **E-H:** Bright field (BF) shows localization of melanocytes (arrowheads) at P7 (E,F) and brown melanin staining at P30 (G, H) (representative of n=5). **A''-B'':** 40X objective magnification with Dct staining in P7 heart valve leaflets. Scale bar = 50  $\mu$ m.

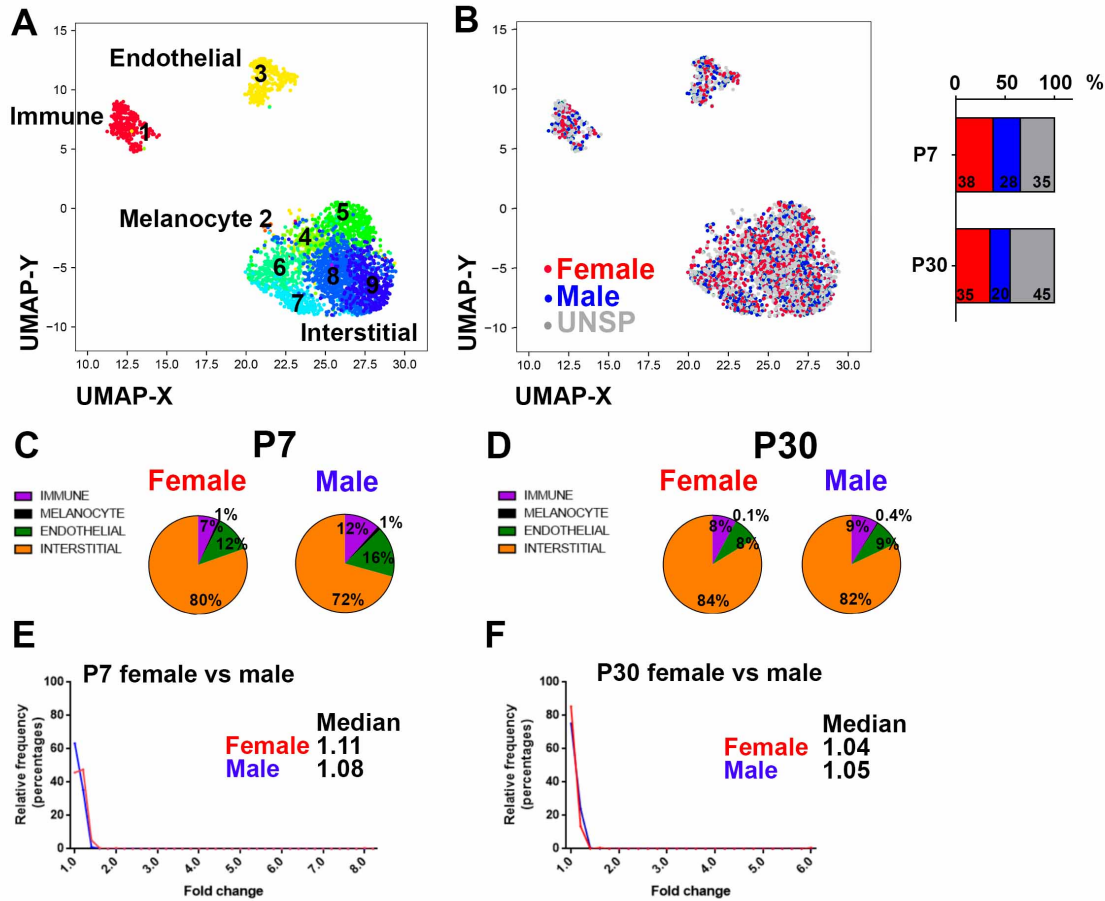

**Figure S2. Cells of female and male origin are similarly represented in heart valve cell clusters.** **A:** UMAP representation derived from ICGS heatmaps shows the 9 cell clusters. **B:** UMAP representation derived from ICGS heatmaps shows female (red), male (blue) cells and unspecified cells (UNSP, grey) with their percentage in each developmental stage (right panel). **C,D:** Pie charts display percentages of male and female cells in each major heart valve cell cluster at P7 (**C**) and P30 (**D**). **E,F:** Graph of fold-changes for expressed genes in female (red) versus male (blue) cells at P7 (**E**) and P30 (**F**).

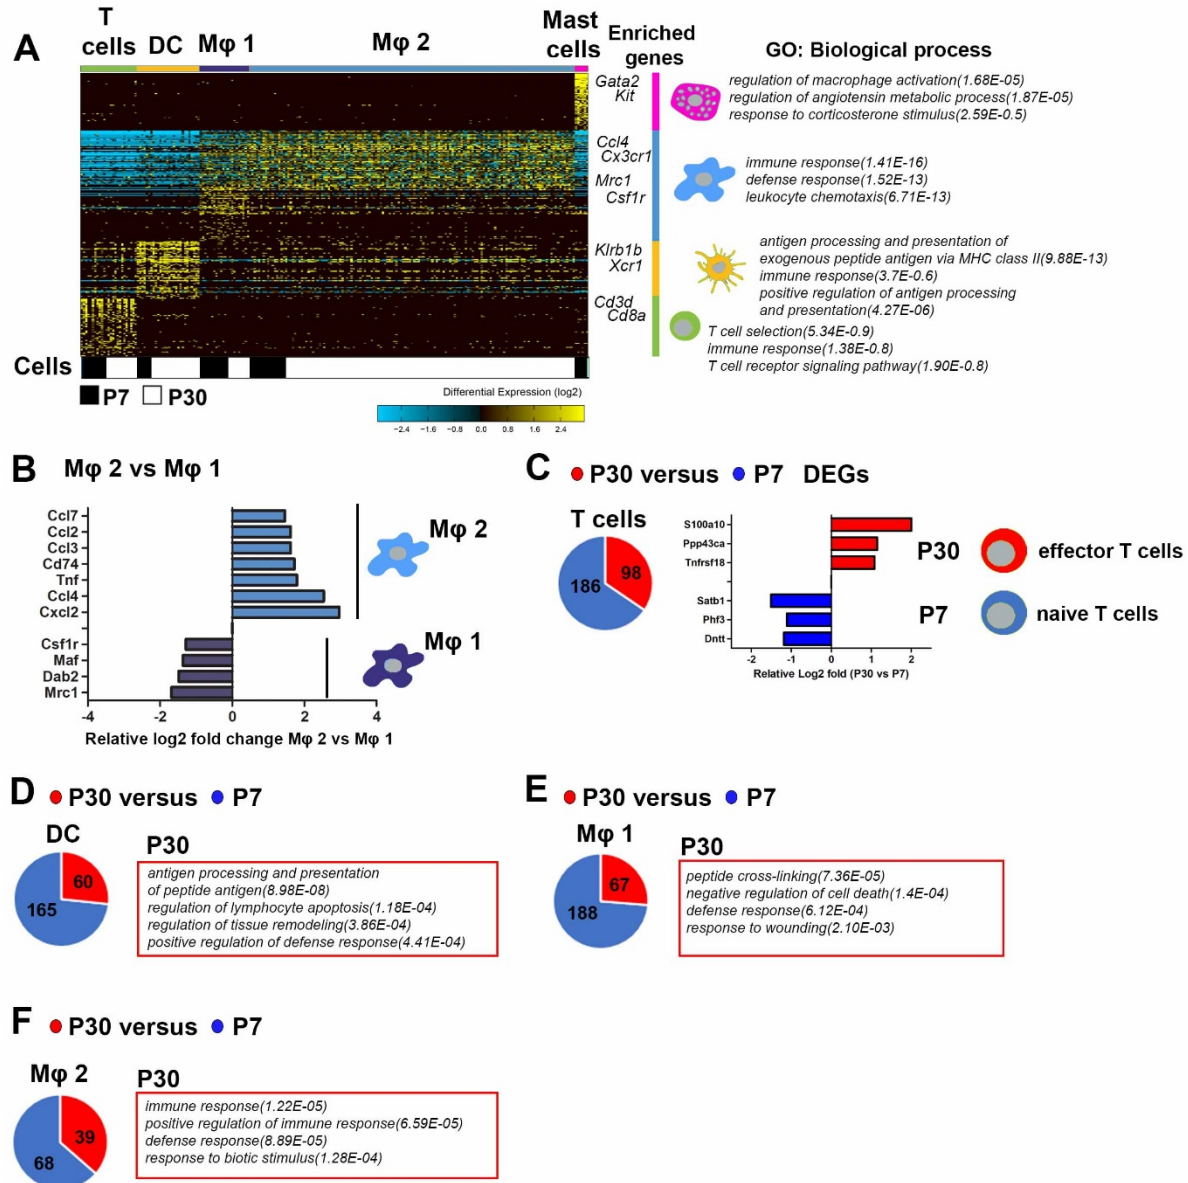

**Figure S3. Heart valve immune cells consist of 5 populations with differentially expressed genes in P30 versus P7 developmental stages.** **A:** Marker finder performed on immune cell clusters of P7 and P30 single cells and top 3 biological processes for cell subpopulations are indicated (n=226 individual cells). **B:** Differentially expressed genes (DEGs) between macrophages Mφ1 and Mφ2 populations. **C:** At least 2-fold DEGs between P30 and P7 T cells. **D-F:** At least 2-fold DEGs between P30 and P7 DC (D), Mφ1 (E) and Mφ2 (F) with the top 4 enriched biological processes for DEGs at P30.

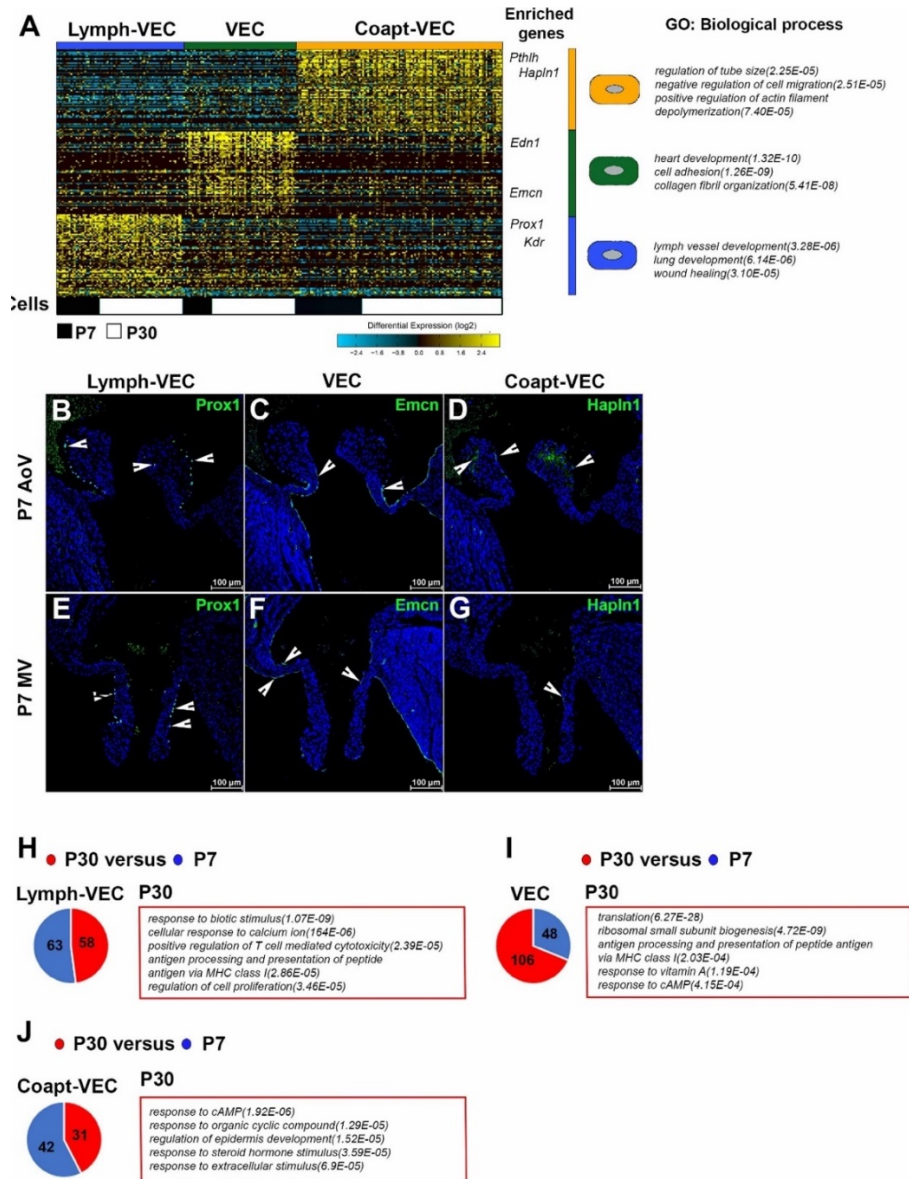

**Figure S4. Endothelial cells include 3 subpopulations present at P7 and P30.** **A:** Marker finder from ICGS performed on endothelial cell clusters of P7 and P30 single cells and top 3 biological processes for cell subpopulations (n=257 cells). **B-G:** Representative immunohistochemistry staining of Prox1 (B,E, Lymph-VEC), Emcn (C,F, VEC) and Hapln1 (D,G, Coapt-VEC) in P7 mouse AoV and MV leaflets. **H-J:** At least 2-fold DEGs between P30 and P7 for lymph-VEC (H), VEC (I), Coapt-VEC (J) subpopulations along with enriched biological processes for P30 DEGs. Scale bar:100μm

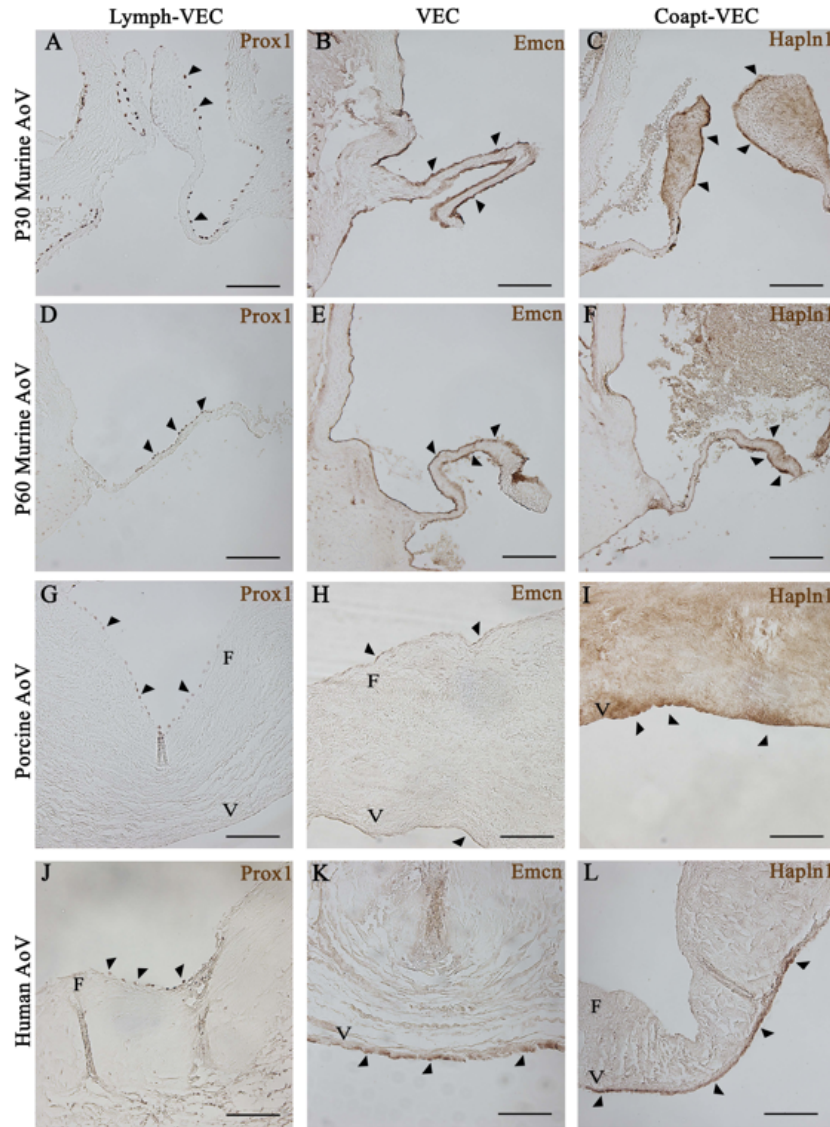

**Figure S5. Endothelial cell subpopulations are present in adult murine, porcine and human aortic valves.** **A-C:** Representative immunohistochemistry of Prox1 staining for Lymph-VEC (**A**, arrows, brown), Emcn for VEC (**B**), and Hapln1 for Coapt-VEC (**C**) in P30 murine AoV leaflets. **D-F:** Representative immunohistochemistry staining of Prox1 (**D**), Emcn (**E**), and Hapln1 (**F**) in P60 murine AoV leaflets. **G-I:** Representative immunohistochemistry of Prox1 staining (**G**), Emcn (**H**), and Hapln1 (**I**) in 6month-3yr porcine AoV leaflets. **J-L:** Representative immunohistochemistry staining (arrows, brown) of Prox1 (**J**), Emcn (**K**), and Hapln1 (**L**) in human right coronary AoV leaflets. Images are representative of n=2-3. Scale bar = 100  $\mu$ m.

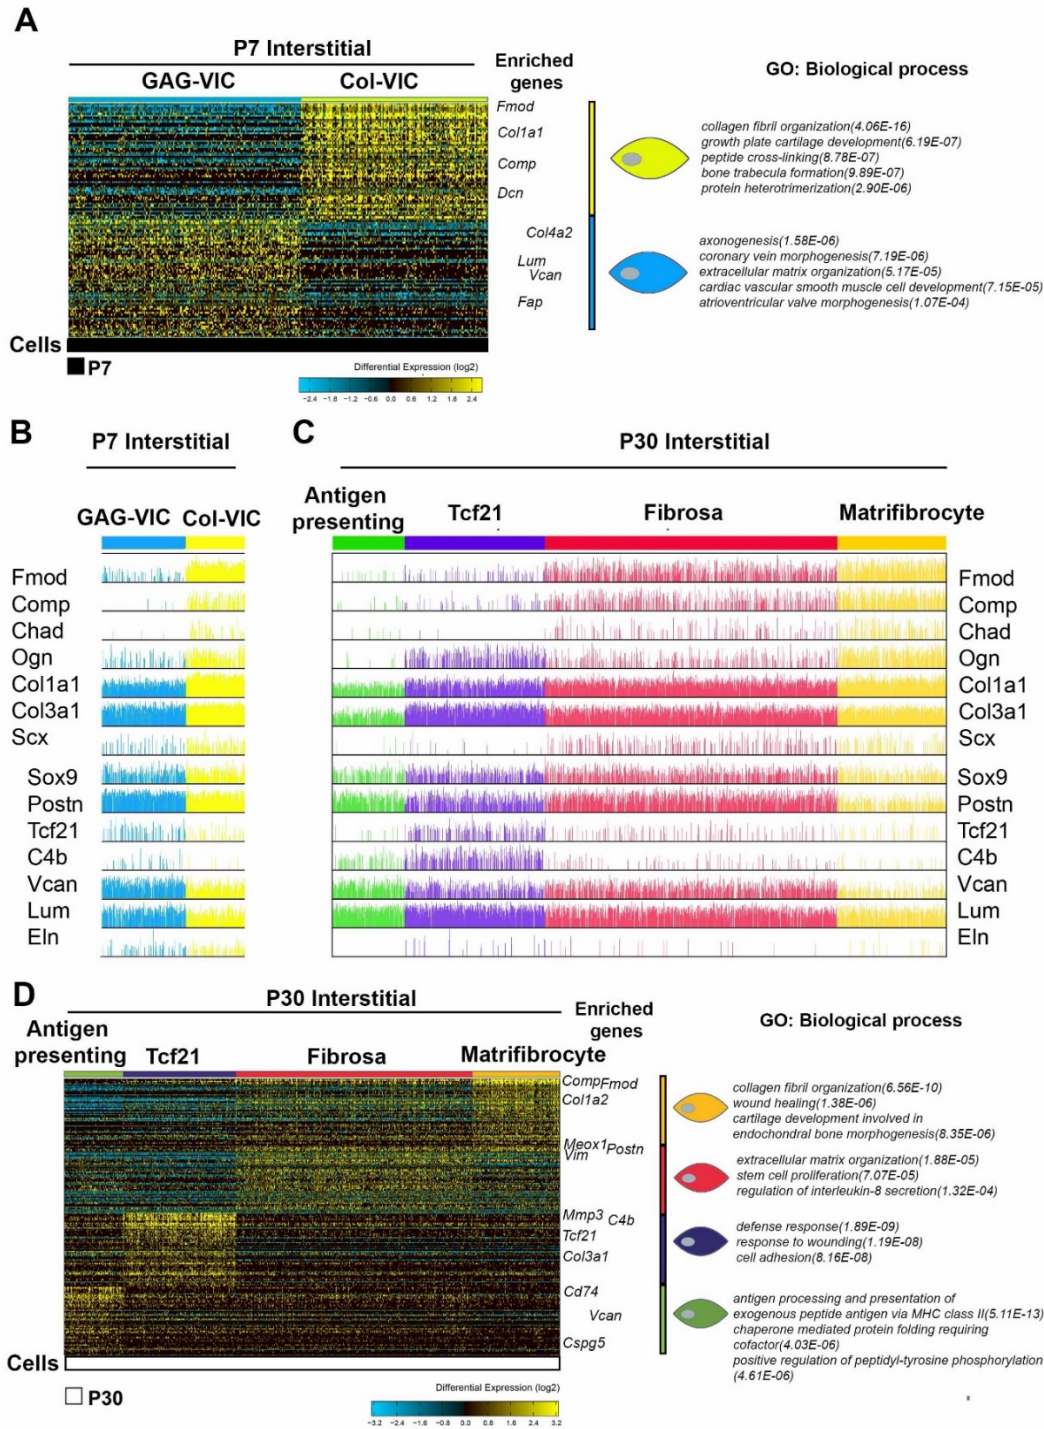

**Figure S6. Valve interstitial cells include 2 subpopulations at P7 and 4 subpopulations in P30 AoV and MV leaflets.** A: Marker finder performed on interstitial cells of P7 and top 5 biological processes for cell subpopulations (n=457 cells). B,C: Comb plots for selected ECM genes in P7 (B) and P30 (C) interstitial cell populations. D: Marker finder performed on interstitial cells of P30 and top 5 biological processes shown in C (n=1889 individual cells).

**Table S1:** List of differentially expressed genes (fold > 2) between **P30 and P7 T cell** subclusters.  $p < 0.05$  determined with empirical Bayes moderated t-test.

| GeneID  | Log2fold<br>(P30 vs P7) | P value<br>(P30 vs P7) |
|---------|-------------------------|------------------------|
| mt-Rnr2 | 3.71                    | 6.49E-08               |
| Tmsb4x  | 3.45                    | 4.74E-06               |
| Malat1  | 3.35                    | 6.83E-06               |
| Trbc1   | 3.26                    | 2.50E-06               |
| H2-D1   | 3.07                    | 9.24E-06               |
| Vim     | 2.90                    | 8.51E-05               |
| B2m     | 2.67                    | 6.52E-05               |
| Cst3    | 2.64                    | 1.04E-02               |
| H2-K1   | 2.51                    | 6.39E-04               |
| Nr4a2   | 2.41                    | 6.81E-04               |
| Ahnak   | 2.33                    | 9.28E-06               |
| Hspa5   | 2.26                    | 2.00E-04               |
| Cd52    | 2.17                    | 1.63E-02               |
| Id2     | 2.10                    | 1.59E-03               |
| Tmsb10  | 2.10                    | 9.76E-03               |
| Igfbp7  | 2.04                    | 1.59E-02               |
| S100a10 | 2.00                    | 7.09E-04               |
| Hsp90b1 | 1.94                    | 1.39E-02               |
| Bcl2a1b | 1.94                    | 1.07E-03               |
| S100a11 | 1.90                    | 6.88E-04               |
| Mgp     | 1.88                    | 3.71E-04               |
| Sparc   | 1.88                    | 1.59E-02               |
| Klf6    | 1.85                    | 2.31E-03               |
| Dpt     | 1.77                    | 1.72E-02               |
| Crip1   | 1.74                    | 7.01E-03               |
| Colla2  | 1.71                    | 2.28E-02               |
| Anxa1   | 1.69                    | 3.34E-03               |
| Ifi203  | 1.68                    | 1.09E-03               |
| Zfp3611 | 1.67                    | 1.60E-03               |
| Bcl2a1d | 1.67                    | 4.87E-03               |
| S100a6  | 1.66                    | 1.63E-03               |
| S100a4  | 1.63                    | 3.69E-03               |
| Anxa5   | 1.62                    | 1.93E-03               |
| Rgs2    | 1.61                    | 1.77E-02               |
| Jund    | 1.60                    | 5.03E-03               |
| Junb    | 1.58                    | 1.87E-02               |

|            |      |          |
|------------|------|----------|
| Timp3      | 1.58 | 1.25E-02 |
| Mndal      | 1.56 | 7.68E-03 |
| Cd74       | 1.54 | 3.96E-02 |
| Serf2      | 1.52 | 6.41E-03 |
| Cyb5r3     | 1.51 | 1.63E-03 |
| Cyba       | 1.50 | 1.20E-03 |
| Fth1       | 1.50 | 4.15E-03 |
| Dcn        | 1.50 | 4.11E-02 |
| Samsn1     | 1.49 | 2.00E-02 |
| Ifi205     | 1.45 | 1.54E-02 |
| Klf4       | 1.43 | 5.53E-03 |
| Vps37b     | 1.40 | 1.66E-02 |
| D17Wsu104e | 1.40 | 4.19E-03 |
| Calm1      | 1.39 | 5.24E-03 |
| Irf8       | 1.39 | 5.36E-03 |
| Smap1      | 1.39 | 3.07E-03 |
| Sh3bgrl3   | 1.38 | 2.48E-02 |
| Arpc1b     | 1.36 | 1.11E-03 |
| Nkg7       | 1.35 | 3.36E-02 |
| Atp2b1     | 1.34 | 3.26E-02 |
| Tbca       | 1.34 | 6.38E-03 |
| H2-Q7      | 1.34 | 9.34E-03 |
| AW112010   | 1.33 | 1.10E-02 |
| Ifitm3     | 1.33 | 1.69E-02 |
| mt-Rnr1    | 1.33 | 3.60E-02 |
| Esf1       | 1.32 | 6.73E-03 |
| Lcp1       | 1.30 | 3.25E-02 |
| Calr       | 1.30 | 3.59E-02 |
| Tpm4       | 1.30 | 1.32E-02 |
| Gadd45b    | 1.30 | 1.10E-02 |
| Bcl2a1a    | 1.28 | 3.75E-03 |
| Zbtb20     | 1.27 | 4.17E-02 |
| Apoe       | 1.26 | 1.66E-02 |
| Rbms1      | 1.25 | 1.51E-02 |
| Btg1       | 1.23 | 4.28E-02 |
| Cwc15      | 1.23 | 8.27E-03 |
| Crem       | 1.23 | 3.12E-02 |
| P4hb       | 1.21 | 6.90E-03 |
| Lyar       | 1.21 | 1.85E-02 |
| Purb       | 1.20 | 1.01E-02 |
| Klrl1      | 1.15 | 1.09E-02 |



|           |       |          |
|-----------|-------|----------|
| Ppp3ca    | 1.15  | 9.00E-03 |
| Ubc       | 1.15  | 1.45E-02 |
| Psm4      | 1.14  | 2.90E-02 |
| Sec62     | 1.12  | 1.85E-02 |
| Cd9       | 1.11  | 4.59E-02 |
| Ppp1r12a  | 1.10  | 1.89E-02 |
| Mrpl52    | 1.10  | 1.65E-02 |
| Ier2      | 1.10  | 2.68E-02 |
| Tnfrsf18  | 1.08  | 2.97E-02 |
| Ndufa12   | 1.08  | 1.42E-02 |
| Mnda      | 1.07  | 3.66E-02 |
| Sra1      | 1.06  | 3.43E-03 |
| Arf4      | 1.06  | 9.47E-03 |
| Cnn2      | 1.06  | 4.80E-02 |
| Ndufa2    | 1.05  | 2.58E-02 |
| Casp4     | 1.05  | 2.80E-02 |
| Naaa      | 1.03  | 3.53E-02 |
| Actr2     | 1.03  | 2.81E-02 |
| Cdkn1a    | 1.03  | 4.64E-02 |
| Syn3      | 1.02  | 2.43E-02 |
| Ccdc12    | 1.01  | 1.31E-02 |
| Ppp1r15a  | 1.00  | 2.90E-02 |
| Rpap3     | -1.00 | 7.93E-03 |
| Rpl7a-ps3 | -1.00 | 1.57E-02 |
| Sumo2     | -1.00 | 3.98E-02 |
| Rpl13-ps3 | -1.01 | 4.78E-02 |
| Atic      | -1.01 | 9.40E-04 |
| Gm8225    | -1.01 | 1.36E-02 |
| mt-Atp6   | -1.01 | 3.76E-02 |
| Snx6      | -1.02 | 1.70E-02 |
| Dtymk     | -1.02 | 2.36E-02 |
| Ablim1    | -1.02 | 4.62E-02 |
| Polr3k    | -1.02 | 9.55E-04 |
| Rhoh      | -1.03 | 3.54E-03 |
| Snrnp70   | -1.03 | 1.45E-02 |
| Hnrnpa1   | -1.03 | 3.45E-02 |
| Ppp2r5c   | -1.04 | 2.84E-02 |
| Hist1h2al | -1.04 | 2.77E-03 |
| Tipin     | -1.04 | 5.49E-03 |
| Sla       | -1.04 | 3.50E-02 |
| Gm7964    | -1.06 | 2.01E-02 |

|           |       |          |
|-----------|-------|----------|
| Ube2d3    | -1.06 | 3.31E-02 |
| Eri1      | -1.07 | 1.59E-03 |
| Gm17541   | -1.07 | 2.89E-02 |
| Gm4978    | -1.07 | 2.16E-02 |
| Cnot2     | -1.08 | 8.90E-04 |
| Tmpo      | -1.08 | 2.52E-02 |
| Itga4     | -1.08 | 5.62E-03 |
| Strbp     | -1.08 | 4.65E-03 |
| Tcf12     | -1.09 | 1.34E-02 |
| Caprin1   | -1.09 | 3.15E-02 |
| Angel2    | -1.09 | 1.27E-03 |
| Ewsr1     | -1.10 | 1.54E-02 |
| Mif       | -1.10 | 3.76E-02 |
| Hspa8     | -1.10 | 1.74E-02 |
| Pgls      | -1.10 | 6.20E-03 |
| Rpl3      | -1.11 | 4.88E-02 |
| Phf3      | -1.11 | 4.21E-02 |
| Mrps33    | -1.11 | 1.20E-02 |
| Pex13     | -1.11 | 1.38E-03 |
| Rps2-ps10 | -1.12 | 3.64E-02 |
| Hist2h2ab | -1.13 | 1.20E-02 |
| Cd3d      | -1.13 | 4.82E-02 |
| Gm16477   | -1.13 | 4.25E-02 |
| Hmga1     | -1.14 | 9.84E-03 |
| Hnrnpk    | -1.14 | 2.28E-02 |
| Ube2i     | -1.15 | 2.91E-02 |
| Chd1      | -1.15 | 1.18E-02 |
| Gm17669   | -1.15 | 1.06E-02 |
| Coro1a    | -1.15 | 2.68E-02 |
| Mcm6      | -1.16 | 8.33E-03 |
| Gmps      | -1.16 | 1.71E-03 |
| Pgk1-rs7  | -1.16 | 4.35E-03 |
| Gm12728   | -1.16 | 1.48E-02 |
| Gm10123   | -1.16 | 6.77E-03 |
| Gm10263   | -1.16 | 1.08E-02 |
| Gm18025   | -1.16 | 4.45E-03 |
| Ddx6      | -1.17 | 3.22E-02 |
| Rtn3      | -1.17 | 3.21E-02 |
| Dntt      | -1.18 | 1.22E-02 |
| Zfp280d   | -1.19 | 2.80E-03 |
| Paics     | -1.19 | 1.88E-03 |

|           |       |          |
|-----------|-------|----------|
| Cdca7     | -1.19 | 3.57E-02 |
| Brd2      | -1.19 | 3.36E-02 |
| Gm6483    | -1.19 | 1.57E-03 |
| Smu1      | -1.19 | 1.66E-04 |
| Cd8b1     | -1.19 | 4.87E-02 |
| Uba2      | -1.20 | 6.56E-04 |
| Rpl30     | -1.20 | 2.02E-02 |
| Fyb       | -1.21 | 4.66E-02 |
| Lat       | -1.21 | 1.77E-02 |
| Naca      | -1.21 | 6.11E-03 |
| Pds5b     | -1.22 | 4.15E-03 |
| Rpl10a    | -1.22 | 2.72E-02 |
| Endou     | -1.22 | 9.25E-04 |
| Hbb-bs    | -1.23 | 3.77E-02 |
| Hist2h2ac | -1.24 | 1.00E-02 |
| Hnrnpa3   | -1.24 | 2.31E-02 |
| Cmip      | -1.25 | 6.43E-03 |
| Gm5619    | -1.25 | 1.83E-02 |
| Gm5641    | -1.25 | 2.24E-02 |
| mt-Nd1    | -1.26 | 8.52E-03 |
| Rpl7a     | -1.26 | 2.95E-02 |
| Eif3f     | -1.26 | 9.85E-03 |
| Rps3a1    | -1.27 | 2.84E-02 |
| Tcp1      | -1.27 | 1.19E-03 |
| H3f3a     | -1.27 | 2.41E-02 |
| Rgcc      | -1.27 | 9.38E-03 |
| Lck       | -1.28 | 8.28E-03 |
| Clk4      | -1.29 | 1.69E-04 |
| Gm5093    | -1.29 | 4.70E-02 |
| Ctage5    | -1.30 | 3.83E-02 |
| Gm15013   | -1.30 | 2.32E-02 |
| Hnrnpm    | -1.31 | 3.63E-02 |
| Sf3b2     | -1.31 | 8.48E-03 |
| Sfpq      | -1.33 | 1.86E-02 |
| Srsf11    | -1.33 | 1.07E-02 |
| Lztfl1    | -1.33 | 1.04E-03 |
| Gm12355   | -1.34 | 7.72E-03 |
| Gmfg      | -1.34 | 2.80E-03 |
| Gm8730    | -1.35 | 1.16E-03 |
| Rpl7a-ps5 | -1.36 | 1.63E-02 |
| Pgk1      | -1.37 | 7.78E-04 |

|               |       |          |
|---------------|-------|----------|
| Smc4          | -1.41 | 2.07E-02 |
| mt-Nd4l       | -1.42 | 8.33E-03 |
| Atp5b         | -1.43 | 5.77E-03 |
| Hdac7         | -1.43 | 2.59E-04 |
| Gm5160        | -1.44 | 1.21E-02 |
| Ucp2          | -1.44 | 1.33E-04 |
| Hist2h2aa2    | -1.45 | 1.97E-02 |
| Matr3         | -1.45 | 8.29E-04 |
| Rrm1          | -1.45 | 1.02E-04 |
| Tia1          | -1.46 | 2.69E-03 |
| Top2a         | -1.46 | 4.64E-02 |
| Rps6          | -1.46 | 7.03E-03 |
| Gm21092       | -1.46 | 6.70E-04 |
| Rpl21         | -1.47 | 1.90E-03 |
| Gm5611        | -1.47 | 1.46E-02 |
| Rrm2          | -1.48 | 4.57E-03 |
| Cfl1          | -1.50 | 1.03E-02 |
| Gm10222       | -1.50 | 4.68E-03 |
| Gm9242        | -1.50 | 3.24E-03 |
| Gm7808        | -1.51 | 4.31E-03 |
| Satb1         | -1.51 | 9.39E-03 |
| mt-Nd4        | -1.51 | 8.77E-03 |
| Srsf3         | -1.51 | 5.15E-03 |
| Anp32e        | -1.53 | 1.33E-02 |
| Gm4968        | -1.53 | 2.71E-03 |
| Gins1         | -1.55 | 6.49E-05 |
| Arpp21        | -1.60 | 8.35E-04 |
| Tuba1b        | -1.60 | 1.83E-02 |
| mt-Atp8       | -1.60 | 3.28E-03 |
| H2afz         | -1.61 | 1.20E-02 |
| mt-Nd5        | -1.61 | 1.10E-02 |
| 2810417H13Rik | -1.62 | 1.68E-02 |
| Tsc22d4       | -1.63 | 1.05E-03 |
| Cdkn1b        | -1.66 | 2.74E-03 |
| AC123611.1    | -1.66 | 3.61E-03 |
| Gm17087       | -1.67 | 5.33E-04 |
| Gm6793        | -1.68 | 6.25E-03 |
| Cd8a          | -1.70 | 3.50E-04 |
| Rpl13a-ps1    | -1.72 | 6.15E-03 |
| AC121131.2    | -1.73 | 2.60E-03 |
| Cd3g          | -1.73 | 2.40E-03 |

|            |       |          |
|------------|-------|----------|
| Gm6576     | -1.73 | 7.02E-04 |
| H2afx      | -1.74 | 5.40E-03 |
| Ccr9       | -1.75 | 7.95E-04 |
| Gm10126    | -1.76 | 1.74E-03 |
| Hba-a1     | -1.78 | 1.08E-03 |
| Hnrnpf     | -1.78 | 5.15E-04 |
| Rbm3       | -1.79 | 3.27E-04 |
| Dusp5      | -1.80 | 4.74E-04 |
| Incenp     | -1.80 | 1.11E-04 |
| Cd24a      | -1.82 | 2.61E-04 |
| Hist1h2ab  | -1.88 | 1.54E-02 |
| Stmn1      | -1.90 | 2.44E-03 |
| Rpl10a-ps2 | -1.96 | 3.91E-04 |
| Bcl11b     | -1.96 | 8.61E-04 |
| Eef2       | -1.96 | 7.91E-04 |
| Tubb2b     | -1.98 | 2.34E-04 |
| Hist1h2ad  | -1.99 | 1.93E-02 |
| Thy1       | -1.99 | 4.57E-04 |
| Hmgb1      | -1.99 | 2.75E-04 |
| AC167036.1 | -2.00 | 2.56E-05 |
| Gm6139     | -2.06 | 2.04E-04 |
| Hist1h2ak  | -2.06 | 6.04E-03 |
| Hist1h2an  | -2.09 | 1.12E-02 |
| Gm8991     | -2.09 | 3.57E-05 |
| Tubb2a     | -2.12 | 8.66E-04 |
| Hist1h2ai  | -2.12 | 1.00E-02 |
| Thrap3     | -2.12 | 2.23E-05 |
| Mier1      | -2.14 | 4.90E-04 |
| Gm5239     | -2.15 | 2.04E-04 |
| Gclm       | -2.17 | 3.11E-04 |
| Myb        | -2.19 | 2.15E-06 |
| Hist1h2ae  | -2.23 | 3.39E-03 |
| Hba-a2     | -2.25 | 6.10E-05 |
| Hist1h2ah  | -2.26 | 6.15E-03 |
| Hist1h2af  | -2.44 | 2.36E-03 |
| Hist1h2ag  | -2.49 | 3.89E-03 |
| Hist1h2ac  | -2.49 | 2.82E-03 |
| Hmgn2      | -2.64 | 5.02E-06 |
| Gm10282    | -2.71 | 2.75E-05 |
| Hist1h2ap  | -2.73 | 2.36E-03 |
| Hist1h2ao  | -2.81 | 1.85E-03 |

|       |       |          |
|-------|-------|----------|
| Tcf7  | -3.26 | 1.85E-07 |
| Trbc2 | -3.36 | 6.83E-05 |
| Trbc1 | -3.63 | 2.50E-06 |

**Table S2:** List of differentially expressed genes (fold > 2) between **P30 and P7 dendritic cell** subclusters.  $p < 0.05$  determined with empirical Bayes moderated t-test.

| GeneID        | Log2fold<br>(P30 vs P7) | P value<br>(P30 vs P7) |
|---------------|-------------------------|------------------------|
| mt-Rnr2       | 4.05                    | 4.84E-09               |
| Cst3          | 2.88                    | 8.70E-04               |
| Malat1        | 2.40                    | 2.88E-06               |
| Jund          | 2.23                    | 5.93E-05               |
| Ppt1          | 2.14                    | 2.52E-03               |
| H2-Aa         | 2.07                    | 1.11E-02               |
| Cox7b         | 2.03                    | 5.77E-04               |
| Tbca          | 1.99                    | 1.85E-05               |
| H2-K1         | 1.96                    | 7.45E-04               |
| Hspa5         | 1.92                    | 7.83E-03               |
| Tomm7         | 1.80                    | 1.32E-03               |
| Cd74          | 1.76                    | 1.02E-02               |
| Fosb          | 1.76                    | 1.34E-02               |
| 5430435G22Rik | 1.74                    | 4.63E-03               |
| B2m           | 1.74                    | 1.68E-04               |
| Irf8          | 1.72                    | 1.29E-02               |
| Cox6a1        | 1.70                    | 5.58E-03               |
| Eif5b         | 1.66                    | 1.13E-02               |
| Prrc2c        | 1.66                    | 1.75E-02               |
| Rgs10         | 1.63                    | 1.88E-03               |
| Crip1         | 1.58                    | 1.24E-03               |
| Psma4         | 1.58                    | 6.33E-03               |
| Ran           | 1.57                    | 3.76E-03               |
| Ckb           | 1.53                    | 1.53E-02               |
| Myl6          | 1.53                    | 1.48E-03               |
| Mpeg1         | 1.50                    | 2.92E-02               |
| Cox6c         | 1.49                    | 7.90E-03               |
| Tmsb4x        | 1.48                    | 1.26E-05               |
| Atp5e         | 1.48                    | 8.75E-03               |
| Llph          | 1.48                    | 5.72E-03               |
| Zfp361l       | 1.41                    | 3.25E-02               |
| Cadm1         | 1.36                    | 1.52E-02               |

|           |       |          |
|-----------|-------|----------|
| Cd44      | 1.35  | 2.90E-02 |
| H2-D1     | 1.34  | 9.44E-04 |
| Abrac1    | 1.33  | 1.40E-02 |
| Xcr1      | 1.30  | 3.72E-02 |
| Top1      | 1.25  | 2.21E-02 |
| Csf2ra    | 1.25  | 4.36E-02 |
| Mgp       | 1.24  | 1.69E-02 |
| Ubash3b   | 1.24  | 1.15E-02 |
| Cox7a2    | 1.23  | 9.82E-03 |
| Rala      | 1.20  | 3.28E-02 |
| Rabep1    | 1.19  | 1.46E-02 |
| Hp1bp3    | 1.17  | 3.92E-02 |
| M6pr      | 1.17  | 4.83E-02 |
| Myl12b    | 1.14  | 1.57E-02 |
| Sumo1     | 1.13  | 1.73E-02 |
| Psme2     | 1.13  | 4.24E-02 |
| Ndufa3    | 1.12  | 4.56E-02 |
| Lsp1      | 1.12  | 3.66E-02 |
| Timm13    | 1.10  | 3.88E-02 |
| Dad1      | 1.09  | 4.19E-02 |
| Sema4a    | 1.06  | 4.00E-02 |
| Zfr       | 1.05  | 4.16E-02 |
| Gm8420    | 1.05  | 3.91E-02 |
| Adam8     | 1.04  | 3.59E-02 |
| Entpd1    | 1.04  | 4.62E-02 |
| Cd24a     | 1.04  | 4.44E-02 |
| Rps14     | 1.03  | 8.92E-03 |
| Bzw1      | 1.01  | 4.09E-02 |
| Ccnc      | -1.00 | 1.76E-04 |
| Lrrc41    | -1.00 | 1.37E-03 |
| Psmd12    | -1.01 | 1.53E-02 |
| mt-Nd1    | -1.01 | 1.94E-02 |
| Rps12     | -1.01 | 1.67E-02 |
| Il6ra     | -1.02 | 4.51E-02 |
| Akirin1   | -1.02 | 4.30E-03 |
| Gm9803    | -1.02 | 3.01E-03 |
| Cul4a     | -1.03 | 2.56E-03 |
| Mir692-2a | -1.03 | 1.54E-02 |
| Gm8225    | -1.03 | 2.95E-03 |
| Gm12728   | -1.03 | 2.06E-02 |
| Eif2s1    | -1.03 | 2.12E-02 |

|               |       |          |
|---------------|-------|----------|
| Rpgrip1       | -1.03 | 2.11E-03 |
| 8430429K09Rik | -1.04 | 1.03E-02 |
| Gm26623       | -1.04 | 2.07E-03 |
| Rassf2        | -1.04 | 1.19E-02 |
| Mb21d1        | -1.04 | 3.30E-03 |
| Cfl1          | -1.05 | 4.90E-02 |
| Gm4204        | -1.05 | 3.58E-02 |
| Gm7808        | -1.05 | 6.69E-03 |
| Gad1l         | -1.05 | 9.14E-03 |
| Ptpn6         | -1.06 | 4.41E-02 |
| Mecp2         | -1.06 | 2.80E-03 |
| Slc30a5       | -1.06 | 4.19E-03 |
| G3bp2         | -1.06 | 4.65E-02 |
| Rps2-ps10     | -1.06 | 4.69E-02 |
| Luc7l2        | -1.06 | 4.13E-02 |
| Cct6a         | -1.06 | 4.09E-02 |
| Rrm2b         | -1.06 | 1.52E-04 |
| Dkc1          | -1.07 | 4.40E-02 |
| Snx5          | -1.07 | 1.69E-02 |
| Tob2          | -1.07 | 1.86E-02 |
| Ap2a2         | -1.07 | 6.21E-03 |
| Rad54l        | -1.07 | 1.32E-04 |
| Gxylt1        | -1.08 | 6.32E-03 |
| Cbwd1         | -1.08 | 1.36E-04 |
| Zfp362        | -1.08 | 1.36E-04 |
| Eif4b         | -1.08 | 4.44E-02 |
| Rpl6          | -1.09 | 1.59E-02 |
| Cox5b         | -1.10 | 4.50E-02 |
| Aldh9a1       | -1.11 | 1.97E-03 |
| Sap30bp       | -1.11 | 1.09E-04 |
| 1110004F10Rik | -1.11 | 1.86E-02 |
| Psip1         | -1.11 | 2.33E-02 |
| Gm15987       | -1.12 | 1.12E-04 |
| Zkscan3       | -1.12 | 1.52E-04 |
| Gm17511       | -1.12 | 1.64E-02 |
| Selt          | -1.12 | 2.64E-03 |
| Tcp1          | -1.12 | 5.19E-03 |
| Rabl6         | -1.13 | 1.88E-02 |
| Acp1          | -1.13 | 2.75E-03 |
| Snrnp40       | -1.13 | 8.52E-04 |
| Kif15         | -1.14 | 3.90E-02 |



|            |       |          |
|------------|-------|----------|
| Ubl3       | -1.14 | 1.96E-02 |
| Wdr26      | -1.14 | 3.69E-02 |
| AC121131.2 | -1.14 | 3.82E-02 |
| Actr2      | -1.14 | 3.79E-02 |
| Cope       | -1.14 | 9.42E-03 |
| Gm10269    | -1.14 | 3.10E-03 |
| Ogt        | -1.15 | 3.61E-03 |
| Sh3glb1    | -1.16 | 2.78E-02 |
| Smarce1    | -1.16 | 1.24E-02 |
| Cnot3      | -1.16 | 4.72E-03 |
| Gm22774    | -1.16 | 6.87E-03 |
| Sp1        | -1.17 | 4.06E-03 |
| Wdhd1      | -1.17 | 1.39E-04 |
| Hist1h2al  | -1.17 | 7.33E-04 |
| Runx1      | -1.17 | 3.38E-03 |
| Rps2-ps6   | -1.18 | 3.75E-02 |
| Cdc37      | -1.18 | 3.56E-02 |
| Hspa8      | -1.18 | 2.53E-02 |
| Safb2      | -1.19 | 1.42E-02 |
| Hba-a2     | -1.19 | 2.21E-02 |
| Gm8730     | -1.19 | 3.01E-02 |
| Nfkb1      | -1.20 | 2.75E-03 |
| Gm5239     | -1.21 | 2.34E-02 |
| Skil       | -1.21 | 4.13E-02 |
| Xrn2       | -1.22 | 4.51E-02 |
| Crlf3      | -1.22 | 2.97E-03 |
| Rbm39      | -1.23 | 2.17E-02 |
| Rpl10a-ps2 | -1.24 | 3.45E-02 |
| Emd        | -1.24 | 4.89E-02 |
| Gclm       | -1.25 | 4.02E-02 |
| Atp5o      | -1.25 | 2.73E-02 |
| Gm3839     | -1.25 | 4.19E-04 |
| H2-DMb2    | -1.25 | 2.25E-02 |
| Gm26825    | -1.25 | 6.50E-04 |
| Rbm5       | -1.26 | 8.84E-03 |
| Cmpk1      | -1.26 | 2.47E-05 |
| Adam10     | -1.26 | 1.54E-03 |
| mt-Nd4     | -1.26 | 2.51E-02 |
| Taok1      | -1.26 | 1.29E-03 |
| Exosc8     | -1.27 | 2.80E-03 |
| Acta1      | -1.27 | 2.31E-04 |

|           |       |          |
|-----------|-------|----------|
| Ccdc50    | -1.28 | 2.79E-02 |
| mt-Ts1    | -1.28 | 1.15E-04 |
| Csnk2a1   | -1.28 | 9.66E-03 |
| Ezh2      | -1.28 | 4.59E-02 |
| Psmc3     | -1.29 | 2.30E-02 |
| Tceb3     | -1.29 | 2.47E-03 |
| Gm5070    | -1.30 | 9.58E-05 |
| Srrm2     | -1.31 | 2.23E-02 |
| Hnrnpa1   | -1.31 | 1.46E-02 |
| Ddx5      | -1.32 | 3.98E-02 |
| Gm5428    | -1.33 | 1.28E-04 |
| Pcf11     | -1.34 | 9.40E-03 |
| Rps3a1    | -1.35 | 1.56E-02 |
| Hnrnpk    | -1.36 | 1.53E-02 |
| Wdr38     | -1.36 | 9.41E-04 |
| Hnrnpa3   | -1.36 | 3.01E-02 |
| Eif5      | -1.38 | 2.51E-02 |
| Gm5641    | -1.38 | 2.26E-02 |
| Rac2      | -1.39 | 6.17E-03 |
| Gm6139    | -1.39 | 1.31E-02 |
| Fam111a   | -1.40 | 3.42E-02 |
| Preli1    | -1.41 | 6.46E-03 |
| Gm17669   | -1.42 | 7.43E-04 |
| Nap111    | -1.42 | 2.95E-02 |
| Slc38a1   | -1.43 | 4.00E-04 |
| Vps37b    | -1.43 | 5.67E-05 |
| H3f3a     | -1.44 | 2.46E-02 |
| Ddx3y     | -1.45 | 8.44E-05 |
| Rpl23a    | -1.46 | 1.63E-02 |
| Snrnp70   | -1.46 | 6.04E-03 |
| Gdi2      | -1.46 | 1.54E-02 |
| Psm6      | -1.47 | 4.48E-04 |
| Phip      | -1.47 | 2.74E-05 |
| Fus       | -1.48 | 6.11E-03 |
| Ptbp3     | -1.49 | 9.33E-03 |
| Caprin1   | -1.49 | 3.75E-03 |
| Gng5      | -1.49 | 1.85E-03 |
| H2afy     | -1.51 | 1.57E-02 |
| Hist1h2ai | -1.53 | 5.09E-04 |
| Hirip3    | -1.55 | 1.24E-03 |
| Capg      | -1.56 | 1.45E-03 |

|         |       |          |
|---------|-------|----------|
| Dhx9    | -1.57 | 4.29E-04 |
| Gm5093  | -1.57 | 6.18E-04 |
| Gm5506  | -1.58 | 6.65E-05 |
| Cd2ap   | -1.61 | 1.09E-02 |
| Gm12355 | -1.62 | 7.98E-04 |
| Coro1a  | -1.67 | 6.89E-04 |
| Rbm3    | -1.69 | 3.17E-04 |
| Hbb-bs  | -1.70 | 2.04E-03 |
| Gm22751 | -1.72 | 1.91E-05 |
| Gm5263  | -1.73 | 2.98E-05 |
| Gm8991  | -1.75 | 2.27E-03 |
| Fam120a | -1.76 | 2.32E-05 |
| Safb    | -1.79 | 1.24E-04 |
| Eif4a1  | -1.79 | 1.62E-03 |
| Gm11273 | -1.80 | 7.22E-04 |
| Gm10020 | -1.84 | 4.81E-04 |
| Ctsh    | -1.88 | 5.83E-04 |
| Gm9242  | -1.91 | 1.70E-04 |
| Shisa5  | -1.91 | 1.33E-05 |
| Eno1    | -1.92 | 2.91E-05 |
| Emb     | -1.95 | 6.87E-06 |
| Pak2    | -2.01 | 4.21E-04 |
| Hmgb1   | -2.03 | 5.04E-03 |
| Tardbp  | -2.05 | 6.21E-05 |
| Gsk3b   | -2.06 | 3.18E-07 |
| Hbb-bt  | -2.17 | 1.33E-05 |
| Gm5244  | -2.18 | 5.69E-05 |
| Gm15013 | -2.20 | 2.19E-04 |
| Gm17087 | -2.23 | 2.87E-04 |

**Table S3:** List of differentially expressed genes (fold > 2) between **P30 and P7 Mφ1** subclusters.  $p < 0.05$  determined with empirical Bayes moderated t-test.

| Gene ID  | Log2fold<br>(P30 vs P7) | P value<br>(P30 vs P7) |
|----------|-------------------------|------------------------|
| mt-Rnr2  | 5.11                    | 3.61E-12               |
| Malat1   | 3.59                    | 1.32E-05               |
| F13a1    | 2.99                    | 1.02E-05               |
| Cbr2     | 2.64                    | 2.83E-05               |
| Ifi2712a | 2.57                    | 3.12E-03               |
| Lyz2     | 2.22                    | 1.90E-04               |
| Pltp     | 2.08                    | 2.46E-06               |
| Folr2    | 1.99                    | 1.61E-05               |
| Crip1    | 1.91                    | 4.91E-03               |
| Maf      | 1.90                    | 1.44E-03               |
| mt-Rnr1  | 1.80                    | 1.94E-04               |
| Slfn2    | 1.77                    | 1.21E-03               |
| Prrc2c   | 1.73                    | 1.35E-02               |
| Wfdc17   | 1.72                    | 3.89E-03               |
| Ifitm3   | 1.63                    | 7.64E-03               |
| Ly6e     | 1.61                    | 2.38E-02               |
| H2-K1    | 1.54                    | 6.20E-03               |
| Bax      | 1.51                    | 4.64E-04               |
| Mcl1     | 1.50                    | 6.89E-03               |
| mt-Co2   | 1.50                    | 8.90E-04               |
| Cd163    | 1.48                    | 2.52E-02               |
| Srsf11   | 1.47                    | 8.92E-03               |
| Zranb2   | 1.46                    | 2.02E-03               |
| C1qc     | 1.45                    | 1.92E-04               |
| Spop     | 1.40                    | 7.81E-03               |
| Tsc22d3  | 1.40                    | 1.59E-02               |
| Tax1bp1  | 1.36                    | 3.51E-02               |
| Igf1     | 1.36                    | 2.76E-02               |
| Rock1    | 1.36                    | 1.98E-02               |
| Ahnak    | 1.33                    | 2.33E-02               |
| Tagln2   | 1.31                    | 2.26E-02               |
| Ccn1     | 1.30                    | 1.20E-02               |
| Psmc8    | 1.30                    | 4.77E-03               |
| Matr3    | 1.30                    | 1.53E-02               |
| Jund     | 1.29                    | 1.38E-02               |
| Ppig     | 1.28                    | 2.10E-02               |

|               |       |          |
|---------------|-------|----------|
| Mndal         | 1.27  | 3.92E-02 |
| Atrx          | 1.26  | 2.33E-02 |
| Gm8420        | 1.25  | 9.28E-03 |
| Zcchc6        | 1.25  | 3.14E-02 |
| Ccl9          | 1.22  | 3.34E-02 |
| Wwp1          | 1.21  | 4.41E-02 |
| Psmb8         | 1.21  | 2.28E-02 |
| Tcf4          | 1.20  | 1.64E-02 |
| Laptm4a       | 1.19  | 3.74E-02 |
| Fam46a        | 1.17  | 1.38E-02 |
| Trafd1        | 1.16  | 4.72E-03 |
| mt-Co3        | 1.15  | 1.04E-02 |
| 1810037I17Rik | 1.15  | 3.17E-02 |
| Ddx60         | 1.14  | 1.00E-02 |
| Cfdp1         | 1.14  | 3.12E-02 |
| Ly86          | 1.14  | 3.00E-02 |
| Prpf38b       | 1.13  | 4.65E-02 |
| Csde1         | 1.10  | 1.35E-02 |
| Dnaja1        | 1.08  | 2.56E-02 |
| Smc3          | 1.08  | 5.00E-02 |
| Anxa1         | 1.07  | 1.22E-02 |
| Snrpe         | 1.06  | 3.35E-02 |
| Cst3          | 1.06  | 2.50E-03 |
| Slc9a9        | 1.06  | 9.78E-03 |
| Hist1h2bc     | 1.04  | 4.39E-02 |
| Dst           | 1.04  | 2.50E-02 |
| Dcn           | 1.03  | 9.47E-03 |
| Wbp5          | 1.02  | 4.97E-02 |
| Zc3h18        | 1.02  | 1.28E-02 |
| Chkb          | 1.01  | 1.13E-02 |
| Rap2b         | 1.00  | 4.71E-02 |
| Oaz1          | -1.00 | 1.20E-02 |
| Cnn2          | -1.01 | 3.31E-02 |
| Srgap2        | -1.01 | 3.25E-02 |
| Hspd1         | -1.01 | 3.67E-02 |
| Amd1          | -1.01 | 1.46E-02 |
| Etfb          | -1.01 | 1.47E-02 |
| Gm10335       | -1.01 | 2.49E-02 |
| Cdk4          | -1.02 | 8.39E-03 |
| Tifab         | -1.02 | 1.52E-02 |
| Arl6ip1       | -1.02 | 4.44E-02 |

|               |       |          |
|---------------|-------|----------|
| Rps18         | -1.02 | 1.49E-02 |
| Eno1          | -1.03 | 3.33E-02 |
| Csflr         | -1.03 | 2.48E-02 |
| Atp5a1        | -1.03 | 4.54E-02 |
| Fstl1         | -1.04 | 1.52E-02 |
| Phf14         | -1.04 | 8.32E-03 |
| Gm10094       | -1.04 | 2.20E-02 |
| Milr1         | -1.04 | 1.33E-02 |
| Ube2n         | -1.04 | 8.12E-03 |
| Gm8994        | -1.04 | 2.08E-03 |
| Syf2          | -1.05 | 1.66E-02 |
| mt-Atp6       | -1.05 | 3.18E-02 |
| St13          | -1.06 | 2.68E-02 |
| Rpl6          | -1.06 | 5.93E-04 |
| Klf3          | -1.06 | 1.61E-02 |
| Csf2rb        | -1.06 | 1.07E-02 |
| Gm10064       | -1.07 | 5.51E-03 |
| Csf2ra        | -1.07 | 2.26E-02 |
| Gm25241       | -1.07 | 5.28E-03 |
| Rhob          | -1.08 | 3.20E-02 |
| 1110008F13Rik | -1.08 | 2.01E-02 |
| Grn           | -1.10 | 3.09E-02 |
| Psmal         | -1.10 | 6.13E-03 |
| Vamp3         | -1.10 | 5.33E-03 |
| Vdac2         | -1.10 | 9.16E-03 |
| Syngn2        | -1.10 | 6.71E-03 |
| Ptplad2       | -1.11 | 1.85E-02 |
| Wdr45b        | -1.11 | 5.55E-03 |
| Dnm1l         | -1.12 | 6.37E-03 |
| Gnas          | -1.13 | 2.70E-02 |
| Cyth4         | -1.14 | 3.00E-02 |
| Arhgdib       | -1.14 | 3.24E-02 |
| AC123611.1    | -1.15 | 4.19E-02 |
| Myl12a        | -1.15 | 3.80E-02 |
| Eif3e         | -1.15 | 2.95E-02 |
| Tuba1a        | -1.15 | 2.64E-02 |
| Gm13251       | -1.15 | 1.54E-02 |
| Rps3a1        | -1.16 | 9.32E-03 |
| Ccni          | -1.17 | 6.38E-03 |
| Gm13248       | -1.18 | 1.87E-02 |
| Gm12728       | -1.18 | 1.48E-03 |

|            |       |          |
|------------|-------|----------|
| Gm16477    | -1.19 | 2.85E-02 |
| Hmha1      | -1.19 | 1.68E-02 |
| Arf1       | -1.19 | 3.01E-02 |
| Srsf3      | -1.19 | 2.07E-02 |
| Brd2       | -1.19 | 1.27E-02 |
| Gm10709    | -1.20 | 5.66E-03 |
| Gm5093     | -1.20 | 2.93E-02 |
| Gm8225     | -1.20 | 9.51E-03 |
| Rbm3       | -1.20 | 8.65E-03 |
| Rpl18a     | -1.21 | 1.02E-02 |
| Gm7729     | -1.21 | 1.41E-03 |
| Gm22774    | -1.21 | 5.32E-03 |
| Set        | -1.21 | 3.50E-02 |
| Gm3940     | -1.22 | 1.83E-02 |
| Gm6576     | -1.22 | 2.86E-02 |
| Igsf6      | -1.23 | 3.18E-02 |
| Fam49b     | -1.23 | 2.78E-02 |
| Adipor1    | -1.23 | 5.13E-03 |
| Nek7       | -1.24 | 5.06E-03 |
| Rpl23a-ps3 | -1.24 | 3.28E-02 |
| Tmem234    | -1.24 | 7.19E-03 |
| Hba-a1     | -1.25 | 2.74E-02 |
| Gm18025    | -1.25 | 5.07E-03 |
| Bzw2       | -1.25 | 2.33E-03 |
| Rpl18      | -1.25 | 1.03E-02 |
| Lsp1       | -1.25 | 4.81E-03 |
| Gm8226     | -1.26 | 1.08E-02 |
| Tm9sf3     | -1.26 | 1.03E-02 |
| Atf4       | -1.26 | 9.20E-03 |
| Pfn1       | -1.27 | 3.42E-02 |
| Npm1       | -1.28 | 2.07E-02 |
| Ppia       | -1.28 | 5.75E-03 |
| Gm22759    | -1.28 | 4.64E-03 |
| Eif4a1     | -1.29 | 2.79E-02 |
| Nop58      | -1.29 | 1.15E-02 |
| Gm12355    | -1.29 | 4.98E-03 |
| Sap18      | -1.29 | 4.13E-03 |
| Fermt3     | -1.29 | 9.23E-03 |
| Rps27a     | -1.30 | 6.01E-03 |
| Rpl21-ps4  | -1.31 | 2.00E-02 |
| Rbm17      | -1.32 | 6.22E-03 |

|               |       |          |
|---------------|-------|----------|
| Gm7536        | -1.32 | 2.15E-03 |
| Tcf25         | -1.33 | 3.17E-02 |
| Cox7a2l       | -1.33 | 5.91E-03 |
| 2410018M08Rik | -1.35 | 3.38E-03 |
| Dnajb6        | -1.35 | 8.72E-03 |
| Gm5786        | -1.35 | 1.01E-02 |
| Vps26a        | -1.35 | 4.33E-03 |
| Pea15a        | -1.35 | 4.74E-03 |
| Rab7          | -1.36 | 3.49E-03 |
| Ucp2          | -1.36 | 4.04E-03 |
| Gm24276       | -1.36 | 3.60E-03 |
| Serbp1        | -1.37 | 5.10E-03 |
| mt-Nd4l       | -1.38 | 1.98E-02 |
| Gm26384       | -1.38 | 1.79E-02 |
| Gm10126       | -1.38 | 1.70E-02 |
| Rpl27a        | -1.38 | 1.79E-02 |
| Cfl1          | -1.38 | 1.10E-02 |
| Gm6139        | -1.38 | 1.92E-02 |
| Gm5506        | -1.39 | 3.79E-03 |
| Gm17541       | -1.39 | 8.20E-03 |
| Hnrnpa3       | -1.39 | 2.13E-02 |
| Rpl10         | -1.40 | 7.21E-03 |
| Rpl5          | -1.40 | 2.50E-02 |
| Sirpa         | -1.40 | 5.15E-03 |
| Rps19         | -1.40 | 1.05E-02 |
| Ptma          | -1.41 | 1.08E-03 |
| Man2b1        | -1.41 | 7.33E-03 |
| Cdc42         | -1.41 | 1.85E-02 |
| Gm4076        | -1.41 | 1.64E-03 |
| Rpl10-ps3     | -1.41 | 6.90E-03 |
| Pa2g4         | -1.41 | 8.19E-03 |
| Rps2-ps10     | -1.41 | 1.65E-02 |
| Rpl36a        | -1.42 | 2.17E-02 |
| Rpl7a-ps5     | -1.42 | 3.75E-03 |
| Gm9242        | -1.44 | 2.85E-03 |
| Rps6          | -1.44 | 8.81E-05 |
| Mir692-2a     | -1.45 | 4.85E-03 |
| Gm10020       | -1.45 | 2.23E-03 |
| Rpl21         | -1.45 | 5.96E-03 |
| Rpl29         | -1.46 | 6.23E-03 |
| Ifngr1        | -1.46 | 1.30E-02 |



|            |       |          |
|------------|-------|----------|
| Bcl2a1d    | -1.46 | 8.91E-03 |
| Gm10263    | -1.48 | 1.87E-03 |
| Rps18-ps3  | -1.48 | 4.44E-03 |
| Gm5641     | -1.49 | 5.10E-03 |
| Gm16372    | -1.50 | 2.99E-04 |
| Dnajc19    | -1.50 | 1.09E-03 |
| Hspa8      | -1.50 | 1.25E-02 |
| Lrrc58     | -1.52 | 7.24E-07 |
| Myl6       | -1.52 | 2.80E-03 |
| Gm26445    | -1.54 | 9.46E-03 |
| Gm9396     | -1.54 | 8.69E-03 |
| Gm10282    | -1.55 | 3.39E-03 |
| Gm10260    | -1.57 | 1.53E-03 |
| Rps4x      | -1.58 | 2.95E-03 |
| Bcl2a1b    | -1.59 | 4.31E-03 |
| Actr3      | -1.59 | 2.99E-03 |
| Gm5619     | -1.60 | 6.99E-04 |
| Hbb-bt     | -1.61 | 1.29E-02 |
| Serp1      | -1.61 | 6.75E-04 |
| Bcl2a1a    | -1.61 | 8.90E-04 |
| Rpl23a     | -1.62 | 2.40E-03 |
| Gm17511    | -1.63 | 5.05E-03 |
| Hmgn2      | -1.66 | 1.52E-03 |
| Gm4968     | -1.67 | 2.95E-04 |
| Gm8991     | -1.68 | 3.15E-04 |
| Hbb-bs     | -1.69 | 4.22E-03 |
| Rpl15      | -1.72 | 1.42E-03 |
| Tram1      | -1.73 | 2.74E-06 |
| Gm7808     | -1.75 | 7.92E-03 |
| Rpl21-ps6  | -1.77 | 3.42E-03 |
| Hba-a2     | -1.77 | 1.30E-03 |
| Fcrls      | -1.77 | 2.31E-03 |
| Rps12      | -1.80 | 3.19E-04 |
| Ppp1r15a   | -1.81 | 2.68E-03 |
| Gm22426    | -1.82 | 3.43E-04 |
| Gm6793     | -1.82 | 3.82E-04 |
| Gm5160     | -1.88 | 1.41E-04 |
| Rps2       | -1.93 | 9.33E-04 |
| Gm5244     | -1.93 | 2.33E-04 |
| Gm24865    | -1.94 | 1.56E-04 |
| AC167036.1 | -1.96 | 5.53E-05 |

|            |       |          |
|------------|-------|----------|
| Gm5611     | -2.04 | 3.25E-05 |
| Rpl10a-ps2 | -2.05 | 2.63E-05 |
| Gm5239     | -2.06 | 1.25E-03 |
| Rpl13a-ps1 | -2.07 | 2.74E-05 |
| Gnb2l1     | -2.09 | 7.04E-05 |
| Rps2-ps6   | -2.17 | 5.73E-05 |
| Gm8730     | -2.37 | 1.92E-05 |
| Rplp0      | -2.45 | 1.16E-04 |
| Eef1a1     | -2.57 | 2.09E-05 |
| Gm15013    | -2.59 | 1.83E-06 |
| Rpl10a     | -2.59 | 5.97E-05 |
| Gclm       | -2.80 | 2.36E-08 |
| Actg1      | -3.04 | 1.69E-06 |
| Gm17087    | -3.23 | 1.76E-08 |

**Table S4:** List of differentially expressed genes (fold > 2) between **P30 and P7 Mφ2** subclusters.  $p < 0.05$  determined with empirical Bayes moderated t-test.

| GeneID   | Log2fold<br>(P30 vs P7) | P value<br>(P30 vs P7) |
|----------|-------------------------|------------------------|
| mt-Rnr2  | 3.65                    | 3.73E-27               |
| Cd74     | 3.02                    | 4.27E-05               |
| H2-Ab1   | 2.80                    | 1.44E-04               |
| H2-Eb1   | 2.59                    | 4.34E-04               |
| H2-Aa    | 2.51                    | 4.41E-04               |
| Malat1   | 2.24                    | 1.39E-16               |
| Ifi2712a | 2.20                    | 2.86E-05               |
| Lyz2     | 1.99                    | 3.33E-04               |
| Mndal    | 1.73                    | 5.08E-05               |
| Ly6e     | 1.64                    | 6.16E-05               |
| Ifitm3   | 1.57                    | 1.27E-04               |
| Jund     | 1.45                    | 3.62E-04               |
| Vim      | 1.41                    | 4.08E-03               |
| Atp6v1a  | 1.36                    | 2.36E-04               |
| C1qb     | 1.30                    | 6.36E-09               |
| Cxcl1    | 1.29                    | 2.49E-02               |
| H2-DMa   | 1.28                    | 5.09E-04               |
| Cend1    | 1.26                    | 3.42E-03               |
| Cdkn1a   | 1.25                    | 4.45E-03               |
| mt-Rnr1  | 1.25                    | 4.03E-03               |
| Cst3     | 1.20                    | 4.15E-08               |

|               |       |          |
|---------------|-------|----------|
| C1qc          | 1.20  | 3.76E-06 |
| Ifi203        | 1.18  | 5.34E-03 |
| Dcn           | 1.16  | 1.55E-03 |
| Prrc2c        | 1.15  | 7.43E-03 |
| Cd52          | 1.11  | 4.93E-03 |
| Ncl           | 1.11  | 4.36E-04 |
| Hmgb2         | 1.10  | 3.47E-02 |
| Mnda          | 1.09  | 7.75E-03 |
| Cd81          | 1.08  | 3.21E-03 |
| Ccdc88a       | 1.08  | 2.28E-03 |
| Tsc22d3       | 1.06  | 3.95E-03 |
| S100a10       | 1.05  | 1.86E-02 |
| Sh3bgrl3      | 1.04  | 1.95E-03 |
| Ythdc1        | 1.04  | 1.32E-02 |
| Psmb8         | 1.03  | 5.77E-03 |
| Casp4         | 1.02  | 1.16E-02 |
| Crip1         | 1.00  | 4.16E-02 |
| Smc1a         | 1.00  | 4.11E-03 |
| Gm3550        | -1.01 | 1.16E-08 |
| Gm5786        | -1.02 | 2.87E-03 |
| Rps6          | -1.02 | 1.44E-03 |
| Etf1          | -1.03 | 1.47E-03 |
| Ucp2          | -1.03 | 1.40E-04 |
| Sdc4          | -1.04 | 2.60E-02 |
| Clk1          | -1.06 | 1.73E-03 |
| Twf1          | -1.06 | 2.10E-06 |
| mt-Nd4l       | -1.07 | 1.07E-03 |
| Clec4n        | -1.07 | 4.12E-03 |
| Cdc42         | -1.07 | 2.29E-03 |
| Gm7729        | -1.09 | 9.53E-10 |
| Rps3a2        | -1.09 | 1.44E-03 |
| Tceb3         | -1.09 | 7.58E-06 |
| Pf4           | -1.09 | 3.20E-02 |
| Dab2          | -1.10 | 1.13E-02 |
| Kif5b         | -1.10 | 1.76E-03 |
| Gm22426       | -1.10 | 1.76E-03 |
| AC167036.1    | -1.11 | 4.58E-04 |
| 2410018M08Rik | -1.11 | 2.33E-05 |
| Gm5160        | -1.11 | 1.44E-04 |
| Gm6139        | -1.11 | 1.31E-03 |
| Lrrc58        | -1.12 | 1.95E-07 |

|            |       |          |
|------------|-------|----------|
| Gm12728    | -1.13 | 2.93E-05 |
| Gm5093     | -1.14 | 1.26E-03 |
| Rps7       | -1.15 | 5.26E-04 |
| Maf        | -1.16 | 2.06E-02 |
| Rpl21-ps6  | -1.16 | 1.21E-03 |
| Sqstm1     | -1.16 | 6.91E-03 |
| Gm6576     | -1.17 | 2.15E-04 |
| Mef2c      | -1.18 | 3.34E-03 |
| Hba-a2     | -1.18 | 1.19E-03 |
| Dusp1      | -1.18 | 1.30E-02 |
| Rps12      | -1.19 | 8.01E-04 |
| AC121131.2 | -1.21 | 2.98E-04 |
| Rps3a1     | -1.22 | 3.50E-04 |
| Hbb-bs     | -1.24 | 8.54E-04 |
| Gm24865    | -1.25 | 1.84E-04 |
| Snx6       | -1.26 | 7.38E-04 |
| Gm5244     | -1.31 | 1.31E-05 |
| Hspd1      | -1.31 | 1.25E-04 |
| Snx5       | -1.32 | 1.83E-04 |
| Ctsl       | -1.35 | 2.18E-04 |
| AC123611.1 | -1.38 | 4.56E-05 |
| Eef1a1     | -1.39 | 5.77E-06 |
| Gm10116    | -1.41 | 9.83E-08 |
| Eef1g      | -1.42 | 5.38E-05 |
| Mir692-1   | -1.45 | 7.84E-12 |
| Rpl3       | -1.47 | 3.93E-05 |
| Gm17669    | -1.51 | 7.01E-11 |
| Ier3       | -1.53 | 5.08E-04 |
| Actg1      | -1.55 | 4.17E-07 |
| Ftl1       | -1.56 | 2.83E-06 |
| Gm7808     | -1.58 | 1.22E-05 |
| Gm10709    | -1.61 | 1.54E-09 |
| Gm5239     | -1.68 | 7.26E-06 |
| Hbb-bt     | -1.74 | 3.80E-08 |
| Fos        | -1.76 | 2.54E-03 |
| Gm22751    | -1.80 | 5.00E-07 |
| Cxcl3      | -1.86 | 3.25E-05 |
| Hba-a1     | -1.94 | 2.10E-08 |
| Mir692-2a  | -1.95 | 7.80E-08 |
| Rpl29      | -1.97 | 3.73E-09 |
| Gm26445    | -2.14 | 2.25E-10 |

|         |       |          |
|---------|-------|----------|
| Gclm    | -2.17 | 2.25E-10 |
| Gm22774 | -2.24 | 3.19E-10 |
| Gm15013 | -2.30 | 3.29E-12 |
| Gm17087 | -2.81 | 3.50E-15 |

**Table S5:** List of differentially expressed genes (fold > 2) between **P30** and **P7 Lymph-VEC** subclusters.  $p < 0.05$  determined with empirical Bayes moderated t-test.

| GeneID   | Log2fold<br>(P30 vs P7) | P value<br>(P30 vs P7) |
|----------|-------------------------|------------------------|
| mt-Rnr2  | 3.46                    | 4.12E-19               |
| H2-K1    | 3.03                    | 7.02E-14               |
| B2m      | 2.74                    | 2.97E-11               |
| H2-D1    | 2.69                    | 3.68E-11               |
| Crip1    | 2.62                    | 1.10E-08               |
| Mgp      | 2.60                    | 1.11E-07               |
| Klf4     | 2.08                    | 4.64E-08               |
| Clu      | 2.05                    | 2.28E-08               |
| Fosb     | 1.96                    | 1.39E-05               |
| Gpr116   | 1.92                    | 3.65E-08               |
| Ifi2712a | 1.90                    | 3.54E-05               |
| Jund     | 1.90                    | 9.12E-09               |
| Malat1   | 1.88                    | 3.12E-13               |
| Cd9      | 1.76                    | 7.80E-07               |
| Igfbp5   | 1.73                    | 3.67E-04               |
| Klf2     | 1.73                    | 1.74E-05               |
| Nfkbia   | 1.72                    | 1.52E-06               |
| mt-Rnr1  | 1.67                    | 1.89E-05               |
| Ifitm3   | 1.66                    | 3.48E-05               |
| Rock2    | 1.61                    | 1.46E-05               |
| Cst3     | 1.52                    | 8.91E-06               |
| Junb     | 1.51                    | 1.70E-04               |
| Dcn      | 1.50                    | 1.38E-04               |
| Klf9     | 1.47                    | 3.72E-05               |
| Heg1     | 1.46                    | 7.40E-05               |
| Tax1bp1  | 1.37                    | 9.19E-05               |
| Sdpr     | 1.36                    | 2.93E-04               |
| Foxp1    | 1.34                    | 2.29E-05               |
| Cytl1    | 1.33                    | 7.20E-05               |
| S100a10  | 1.31                    | 8.65E-05               |
| Tsc22d3  | 1.29                    | 5.64E-05               |

|         |       |          |
|---------|-------|----------|
| Actn1   | 1.26  | 3.33E-04 |
| Ier3    | 1.24  | 2.96E-03 |
| Ubc     | 1.20  | 2.74E-03 |
| Akap13  | 1.20  | 1.10E-03 |
| Slfn5   | 1.19  | 1.20E-04 |
| Gpx1    | 1.17  | 1.42E-03 |
| Egr1    | 1.17  | 3.12E-03 |
| Cfh     | 1.17  | 3.97E-03 |
| Fos     | 1.16  | 8.50E-03 |
| Golm1   | 1.15  | 1.48E-03 |
| Serinc3 | 1.15  | 7.33E-05 |
| Ctla2a  | 1.14  | 9.58E-03 |
| Itm2b   | 1.14  | 3.75E-04 |
| Ccdc80  | 1.14  | 3.09E-03 |
| Ptgs1   | 1.10  | 5.09E-04 |
| Gbp7    | 1.10  | 5.14E-04 |
| Tob1    | 1.09  | 1.12E-04 |
| Neat1   | 1.07  | 2.45E-03 |
| Actb    | 1.06  | 1.00E-03 |
| Cd47    | 1.06  | 2.14E-04 |
| Arid4b  | 1.03  | 1.56E-03 |
| Prrc2c  | 1.03  | 4.54E-03 |
| Dstn    | 1.03  | 2.97E-03 |
| Hspb1   | 1.02  | 1.40E-03 |
| Capzb   | 1.02  | 5.16E-04 |
| Palmd   | 1.02  | 3.61E-03 |
| Ltbp4   | 1.02  | 1.11E-03 |
| Rps6    | -1.00 | 6.54E-05 |
| Gm17669 | -1.01 | 6.02E-07 |
| Rps13   | -1.01 | 4.34E-03 |
| Rpl6    | -1.02 | 1.91E-03 |
| Gm8730  | -1.02 | 2.51E-03 |
| Gm10269 | -1.04 | 1.33E-03 |
| Gm6483  | -1.04 | 7.19E-06 |
| Gm10335 | -1.04 | 1.22E-03 |
| Rps3a2  | -1.05 | 6.11E-05 |
| Gclm    | -1.05 | 1.21E-03 |
| Tspan18 | -1.05 | 1.47E-04 |
| mt-Nd4l | -1.06 | 1.23E-03 |
| Tmsb10  | -1.07 | 2.30E-03 |
| Ank3    | -1.08 | 1.82E-05 |

|            |       |          |
|------------|-------|----------|
| Gm5641     | -1.08 | 7.11E-04 |
| Hnrnpa1    | -1.09 | 3.39E-05 |
| Cd59a      | -1.09 | 1.82E-03 |
| Gm7729     | -1.10 | 4.29E-06 |
| Rpl10a     | -1.10 | 1.03E-03 |
| Gm4968     | -1.10 | 2.85E-06 |
| Gm9396     | -1.10 | 2.08E-04 |
| Gm21092    | -1.10 | 8.96E-06 |
| Gm5093     | -1.10 | 1.06E-03 |
| Sparc      | -1.11 | 5.34E-03 |
| Rps19      | -1.12 | 1.75E-04 |
| Marcks     | -1.14 | 8.04E-04 |
| Gm6139     | -1.15 | 3.57E-04 |
| Gm9242     | -1.15 | 2.30E-05 |
| Gm5428     | -1.16 | 2.83E-04 |
| Gm16477    | -1.16 | 7.40E-05 |
| Rpl21-ps4  | -1.19 | 5.10E-05 |
| Rpl3       | -1.20 | 3.37E-04 |
| Gm5786     | -1.24 | 5.74E-05 |
| Hnrnpa2b1  | -1.27 | 2.94E-04 |
| Fstl1      | -1.27 | 1.45E-04 |
| Gm6793     | -1.29 | 4.13E-05 |
| Gm5244     | -1.29 | 1.05E-05 |
| Rpl29      | -1.30 | 6.32E-06 |
| Cd59b      | -1.31 | 2.25E-07 |
| Gm17511    | -1.32 | 1.89E-05 |
| Gm18025    | -1.36 | 1.70E-08 |
| Rps3a1     | -1.36 | 3.13E-05 |
| AC102758.1 | -1.36 | 2.80E-07 |
| Rps2-ps10  | -1.39 | 7.03E-06 |
| Gm10222    | -1.41 | 5.94E-06 |
| Hbb-bt     | -1.42 | 7.19E-04 |
| Rpl13a-ps1 | -1.47 | 1.46E-05 |
| Hba-a2     | -1.49 | 4.00E-04 |
| Hba-a1     | -1.51 | 2.98E-04 |
| Gm7808     | -1.53 | 5.03E-06 |
| AC167036.1 | -1.57 | 1.13E-07 |
| Hmg2       | -1.60 | 2.35E-06 |
| Fbn2       | -1.62 | 1.60E-07 |
| Hbb-bs     | -1.62 | 2.19E-04 |
| Mdk        | -1.66 | 2.26E-10 |

|            |       |          |
|------------|-------|----------|
| Gm5239     | -1.75 | 1.40E-07 |
| Postn      | -1.79 | 2.57E-06 |
| AC123611.1 | -1.88 | 1.40E-08 |
| Gm10282    | -1.96 | 1.13E-09 |
| Gm15013    | -2.00 | 6.47E-12 |
| Pdgfra     | -2.04 | 4.14E-09 |
| AC121131.2 | -2.23 | 7.42E-12 |
| H19        | -2.39 | 1.40E-04 |

**Table S6:** List of differentially expressed genes (fold > 2) between **P30 and P7 VEC** subclusters.  $p < 0.05$  determined with empirical Bayes moderated t-test.

| GeneID  | Log2fold<br>(P30 vs P7) | P value<br>(P30 vs P7) |
|---------|-------------------------|------------------------|
| Timp3   | 2.97                    | 2.02E-08               |
| mt-Rnr2 | 2.95                    | 1.50E-14               |
| Dcn     | 2.57                    | 6.25E-06               |
| Cst3    | 2.50                    | 6.58E-12               |
| Cytl1   | 2.21                    | 7.13E-06               |
| Mgp     | 2.20                    | 5.27E-06               |
| Klf4    | 2.20                    | 4.19E-06               |
| Gm9843  | 2.08                    | 6.49E-08               |
| Tm4sf1  | 1.96                    | 4.40E-04               |
| Tpt1    | 1.95                    | 4.00E-08               |
| Syn3    | 1.94                    | 1.89E-05               |
| Rpl22   | 1.93                    | 3.32E-08               |
| Gm9846  | 1.92                    | 9.16E-07               |
| Fmo2    | 1.89                    | 2.26E-03               |
| Cfh     | 1.86                    | 1.41E-04               |
| Jund    | 1.83                    | 1.98E-09               |
| Rps29   | 1.79                    | 6.29E-08               |
| Rpl34   | 1.78                    | 1.11E-06               |
| Malat1  | 1.75                    | 2.79E-10               |
| Fau     | 1.75                    | 2.59E-06               |
| Rps24   | 1.73                    | 2.61E-05               |
| Fosb    | 1.70                    | 1.39E-03               |
| Rps27   | 1.63                    | 2.88E-06               |
| Nfkbia  | 1.63                    | 2.12E-04               |
| Sdpr    | 1.55                    | 1.17E-04               |
| B2m     | 1.54                    | 9.51E-05               |
| Sepp1   | 1.54                    | 7.08E-04               |



|            |      |          |
|------------|------|----------|
| Slc25a4    | 1.54 | 1.37E-04 |
| Rps9       | 1.52 | 6.02E-05 |
| Aldh2      | 1.49 | 1.84E-05 |
| Klf9       | 1.48 | 3.21E-04 |
| Rps20      | 1.48 | 4.50E-05 |
| Ifitm3     | 1.47 | 2.04E-04 |
| Rps14      | 1.46 | 8.99E-06 |
| Ndufa7     | 1.45 | 1.69E-07 |
| Tinag1l    | 1.45 | 1.69E-05 |
| Fth1       | 1.43 | 2.33E-05 |
| Fos        | 1.43 | 4.19E-03 |
| Uqcrh      | 1.42 | 1.12E-04 |
| Tmsb4x     | 1.39 | 7.84E-05 |
| Egr1       | 1.39 | 1.26E-02 |
| Aqp1       | 1.36 | 1.04E-03 |
| Clu        | 1.35 | 2.87E-03 |
| Rps10-ps1  | 1.35 | 1.36E-04 |
| Dusp1      | 1.34 | 1.86E-03 |
| Apoe       | 1.33 | 1.29E-02 |
| Crip1      | 1.33 | 3.00E-03 |
| Tmem256    | 1.32 | 6.82E-05 |
| Rock1      | 1.32 | 3.65E-04 |
| Atf3       | 1.31 | 1.94E-02 |
| Cox6b1     | 1.30 | 2.78E-04 |
| Ncl        | 1.29 | 4.22E-05 |
| Myl6       | 1.29 | 1.93E-04 |
| Rpl36      | 1.26 | 6.43E-05 |
| Gabarapl1  | 1.26 | 4.41E-03 |
| H2-K1      | 1.26 | 1.28E-03 |
| Tbca       | 1.23 | 2.11E-04 |
| Nop58      | 1.22 | 4.56E-03 |
| Rpl23a-ps3 | 1.21 | 6.01E-04 |
| Rpl32      | 1.21 | 1.80E-04 |
| S100a13    | 1.21 | 3.10E-05 |
| Rpl26      | 1.19 | 4.97E-04 |
| Rpl37      | 1.18 | 9.74E-04 |
| Rps26      | 1.17 | 2.68E-04 |
| Plvap      | 1.16 | 4.00E-03 |
| Igfbp7     | 1.14 | 1.59E-02 |
| Ifitm2     | 1.14 | 1.52E-03 |
| Lum        | 1.14 | 1.16E-02 |

|          |       |          |
|----------|-------|----------|
| Rpl41    | 1.14  | 4.67E-04 |
| Rbp1     | 1.13  | 5.80E-03 |
| Rpl2211  | 1.13  | 7.73E-04 |
| Pfdn5    | 1.13  | 8.57E-04 |
| Gstm1    | 1.12  | 2.16E-04 |
| Ifi2712a | 1.12  | 3.36E-03 |
| Atp5j    | 1.11  | 2.23E-03 |
| Tax1bp1  | 1.11  | 2.22E-03 |
| Bmx      | 1.11  | 2.79E-02 |
| Cox8a    | 1.11  | 4.08E-04 |
| Gm11808  | 1.11  | 3.51E-04 |
| Rsrc2    | 1.10  | 4.30E-04 |
| Psm7     | 1.10  | 3.17E-03 |
| Klf2     | 1.10  | 1.19E-02 |
| Gm7536   | 1.10  | 5.75E-04 |
| Actn4    | 1.09  | 1.17E-03 |
| Rps19    | 1.09  | 1.75E-03 |
| Rps25    | 1.08  | 1.83E-03 |
| Dusp6    | 1.07  | 2.43E-03 |
| Rpl13a   | 1.06  | 1.51E-03 |
| Wdr89    | 1.06  | 7.42E-05 |
| S100a6   | 1.06  | 1.14E-02 |
| Rplp1    | 1.05  | 3.81E-04 |
| Rock2    | 1.05  | 2.89E-03 |
| Tomm7    | 1.05  | 9.10E-04 |
| Rpl23    | 1.05  | 5.36E-04 |
| Rpl14    | 1.04  | 1.61E-03 |
| Cd9      | 1.04  | 7.28E-03 |
| Chchd2   | 1.03  | 2.33E-03 |
| Cpe      | 1.03  | 1.37E-02 |
| Gm10288  | 1.03  | 3.65E-03 |
| Zcchc6   | 1.02  | 1.19E-03 |
| Rps4x    | 1.02  | 2.22E-03 |
| Crim1    | 1.02  | 1.22E-02 |
| H2-D1    | 1.01  | 8.93E-03 |
| Nrp1     | 1.00  | 4.22E-02 |
| Rps15    | 1.00  | 1.15E-03 |
| Nedd8    | 1.00  | 1.22E-03 |
| Gm8991   | -1.00 | 1.39E-04 |
| Gm5244   | -1.00 | 1.76E-03 |
| Mki67    | -1.02 | 1.05E-03 |

|          |       |          |
|----------|-------|----------|
| Ctnn     | -1.02 | 2.79E-06 |
| Gm7729   | -1.02 | 3.44E-05 |
| Fus      | -1.03 | 1.43E-03 |
| Igf2     | -1.03 | 3.59E-03 |
| Gm5160   | -1.03 | 3.77E-05 |
| Dot1l    | -1.04 | 1.07E-05 |
| Tmpo     | -1.05 | 2.27E-04 |
| Srsf10   | -1.06 | 2.00E-04 |
| Mxra8    | -1.06 | 4.42E-04 |
| mt-Nd4   | -1.06 | 2.33E-04 |
| Ankrd10  | -1.07 | 1.03E-06 |
| Hmgn2    | -1.07 | 1.43E-03 |
| Gapdh    | -1.07 | 1.02E-04 |
| Top2a    | -1.09 | 7.03E-04 |
| Gm9242   | -1.11 | 7.34E-06 |
| Stmn1    | -1.15 | 5.50E-06 |
| Srsf5    | -1.19 | 2.25E-04 |
| Fnbp1l   | -1.22 | 1.59E-05 |
| Postn    | -1.22 | 1.42E-02 |
| H19      | -1.24 | 4.13E-05 |
| Hnrnpa1  | -1.25 | 1.25E-04 |
| Nedd4    | -1.25 | 6.68E-05 |
| Srrm2    | -1.27 | 9.27E-04 |
| Hnrnpa3  | -1.28 | 1.78E-04 |
| Sparc    | -1.29 | 5.88E-04 |
| Gm17087  | -1.33 | 8.22E-06 |
| Fstl1    | -1.41 | 3.07E-04 |
| Gm5641   | -1.43 | 6.16E-06 |
| Eln      | -1.46 | 7.82E-07 |
| Col3a1   | -1.46 | 3.93E-03 |
| Dync1li2 | -1.47 | 2.00E-08 |
| Fbln2    | -1.51 | 8.60E-05 |
| mt-Atp8  | -1.53 | 1.23E-05 |
| Vcan     | -1.56 | 3.80E-04 |
| mt-Nd1   | -1.56 | 3.85E-06 |
| Sele     | -1.62 | 1.27E-03 |
| mt-Nd5   | -1.67 | 7.30E-05 |
| mt-Nd4l  | -1.76 | 5.09E-07 |
| Gm10222  | -1.77 | 1.37E-05 |
| Gm4076   | -1.78 | 1.31E-09 |
| Col5a2   | -1.91 | 1.37E-08 |

|        |       |          |
|--------|-------|----------|
| Hbb-bt | -2.11 | 3.33E-05 |
| Hbb-bs | -2.16 | 2.85E-05 |
| Hba-a1 | -2.19 | 2.19E-05 |
| Hba-a2 | -2.24 | 1.37E-05 |

**Table S7:** List of differentially expressed genes (fold > 2) between P30 and P7 Coapt-VEC subclusters.  $p < 0.05$  determined with empirical Bayes moderated t-test.

| GeneID    | Log2fold<br>(P30 vs P7) | P value<br>(P30 vs P7) |
|-----------|-------------------------|------------------------|
| mt-Rnr2   | 3.35                    | 5.67E-32               |
| Malat1    | 2.79                    | 2.62E-25               |
| Ifi2712a  | 2.26                    | 3.94E-12               |
| Egr1      | 2.02                    | 3.79E-09               |
| Igfbp5    | 2.00                    | 7.49E-05               |
| Fos       | 1.87                    | 6.37E-10               |
| Inhba     | 1.84                    | 4.53E-06               |
| mt-Rnr1   | 1.76                    | 1.82E-11               |
| Timp3     | 1.68                    | 1.92E-06               |
| Ly6a      | 1.46                    | 5.17E-05               |
| Cst3      | 1.45                    | 6.26E-10               |
| B2m       | 1.44                    | 2.34E-09               |
| Fosb      | 1.36                    | 6.80E-05               |
| Atf3      | 1.32                    | 2.63E-04               |
| Ankrd12   | 1.31                    | 5.74E-08               |
| Jund      | 1.30                    | 3.30E-09               |
| Hsp90aa1  | 1.28                    | 4.48E-06               |
| Rock1     | 1.25                    | 1.63E-07               |
| Klf4      | 1.19                    | 1.28E-05               |
| Hmgn5     | 1.18                    | 9.79E-07               |
| Ackr3     | 1.14                    | 7.62E-06               |
| Gpx1      | 1.11                    | 4.17E-05               |
| Rock2     | 1.09                    | 5.77E-05               |
| Dusp1     | 1.07                    | 1.84E-05               |
| Atrx      | 1.06                    | 1.22E-04               |
| Sepp1     | 1.06                    | 1.96E-05               |
| Gng11     | 1.04                    | 1.15E-05               |
| Nfkbia    | 1.03                    | 3.13E-04               |
| Cox17     | 1.01                    | 1.20E-06               |
| Hist1h2bc | 1.01                    | 8.00E-05               |
| Mgp       | 1.00                    | 3.33E-03               |

|               |       |          |
|---------------|-------|----------|
| Krt75         | -1.00 | 2.69E-13 |
| Gm15013       | -1.00 | 2.21E-07 |
| Hnrnpa3       | -1.01 | 3.25E-05 |
| Rpl3          | -1.02 | 1.13E-06 |
| Rps2-ps10     | -1.02 | 3.79E-06 |
| Gm5611        | -1.03 | 2.51E-06 |
| AC123611.1    | -1.04 | 5.45E-07 |
| Rpl15         | -1.07 | 5.31E-06 |
| Gapdh         | -1.08 | 7.36E-09 |
| mt-Atp8       | -1.09 | 2.23E-06 |
| Hnrnpa1       | -1.09 | 1.56E-08 |
| Hnrnpk        | -1.12 | 1.37E-07 |
| Hnrnpf        | -1.13 | 4.40E-10 |
| Rpl13a-ps1    | -1.13 | 1.23E-07 |
| Gm7964        | -1.14 | 8.94E-10 |
| Gm10020       | -1.15 | 5.11E-07 |
| Gm6139        | -1.17 | 9.94E-08 |
| Vcan          | -1.17 | 3.51E-05 |
| Gm4076        | -1.18 | 4.18E-09 |
| 2410018M08Rik | -1.19 | 4.59E-08 |
| Hbb-bt        | -1.20 | 1.12E-05 |
| Hba-a1        | -1.26 | 6.59E-06 |
| Gm8991        | -1.27 | 6.09E-13 |
| Afap111       | -1.28 | 3.56E-08 |
| Hba-a2        | -1.30 | 5.30E-07 |
| Gm9242        | -1.31 | 5.29E-14 |
| Gm8225        | -1.32 | 8.98E-15 |
| mt-Nd1        | -1.34 | 1.44E-08 |
| Gm17087       | -1.35 | 9.47E-15 |
| Gm5641        | -1.35 | 7.65E-11 |
| Gm6793        | -1.39 | 1.99E-12 |
| Gm10222       | -1.43 | 4.38E-08 |
| Sparc         | -1.47 | 2.68E-07 |
| Hbb-bs        | -1.50 | 3.60E-08 |
| Gm5160        | -1.52 | 9.16E-14 |
| mt-Nd4l       | -1.53 | 3.06E-09 |
| mt-Nd5        | -1.55 | 7.17E-09 |
| Fstl1         | -1.66 | 3.71E-12 |
| Tmsb10        | -1.67 | 7.99E-09 |
| Gclm          | -1.75 | 2.67E-12 |
| Igf2          | -2.77 | 2.39E-09 |

|     |       |          |
|-----|-------|----------|
| H19 | -3.18 | 3.55E-10 |
|-----|-------|----------|

**Table S8:** List of differentially expressed genes (fold > 2) between **P30 and P7 VICs**.  $p < 0.05$  determined with empirical Bayes moderated t-test.

| GeneID         | Log2fold<br>(P7 vs P30) | P value<br>(P7 vs P30) |
|----------------|-------------------------|------------------------|
| Postn          | 2.43                    | 3.14E-160              |
| Nrep           | 2.21                    | 3.56E-268              |
| Sfrp2          | 2.11                    | 8.01E-117              |
| Col3a1         | 1.92                    | 7.67E-147              |
| mt-Nd4l        | 1.84                    | 6.95E-156              |
| Gm10222        | 1.78                    | 2.10E-135              |
| Gm17087        | 1.71                    | 8.89E-255              |
| Hba-a2         | 1.63                    | 4.49E-95               |
| Hbb-bt         | 1.59                    | 5.68E-98               |
| Hbb-bs         | 1.58                    | 1.72E-83               |
| Hba-a1         | 1.53                    | 2.38E-82               |
| Fbn2           | 1.49                    | 1.02E-201              |
| Itih5          | 1.48                    | 8.98E-66               |
| Col5a2         | 1.47                    | 1.17E-77               |
| mt-Nd5         | 1.44                    | 5.21E-91               |
| Fstl1          | 1.42                    | 1.72E-142              |
| Gm5641         | 1.33                    | 2.68E-100              |
| Colla1         | 1.32                    | 1.52E-74               |
| Gm15013        | 1.30                    | 8.60E-96               |
| Gclm           | 1.29                    | 1.55E-93               |
| Gm6793         | 1.27                    | 1.43E-114              |
| Lrrc58         | 1.25                    | 1.71E-108              |
| Nedd4          | 1.23                    | 3.22E-76               |
| Col5a1         | 1.21                    | 2.82E-67               |
| Gm8991         | 1.21                    | 1.24E-128              |
| Gm9242         | 1.20                    | 4.79E-123              |
| Cthrc1         | 1.18                    | 4.27E-117              |
| Gm4076         | 1.16                    | 1.89E-102              |
| Mdk            | 1.14                    | 1.10E-69               |
| Fbln2          | 1.10                    | 4.62E-61               |
| Gm10282        | 1.10                    | 1.69E-65               |
| Hmgn2          | 1.10                    | 5.65E-63               |
| RP23-103I12.13 | 1.09                    | 3.38E-48               |
| Actg1          | 1.07                    | 9.50E-53               |

|            |       |           |
|------------|-------|-----------|
| Lox        | 1.07  | 4.89E-111 |
| Htra1      | 1.07  | 7.55E-49  |
| Tuba1c     | 1.07  | 1.53E-61  |
| Hnrnpa3    | 1.07  | 4.24E-56  |
| Fbn1       | 1.06  | 1.69E-52  |
| Sox4       | 1.06  | 1.14E-67  |
| AC123611.1 | 1.04  | 8.91E-63  |
| mt-Atp8    | 1.04  | 6.79E-54  |
| Eif4g2     | 1.03  | 2.67E-61  |
| Gm8225     | 1.02  | 9.09E-124 |
| AC121131.2 | 1.01  | 7.54E-58  |
| Loxl2      | 1.01  | 1.67E-34  |
| Marcks     | 1.01  | 1.10E-41  |
| Sfrp1      | 1.01  | 2.48E-32  |
| Cxcl1      | -1.00 | 2.46E-24  |
| Igfbp7     | -1.03 | 1.41E-119 |
| Cd59a      | -1.04 | 1.48E-50  |
| Anxa1      | -1.04 | 5.85E-34  |
| Crip1      | -1.05 | 1.97E-38  |
| Rpl39      | -1.05 | 9.08E-66  |
| S100a10    | -1.06 | 5.40E-40  |
| Tmsb4x     | -1.07 | 2.92E-54  |
| Serpinf1   | -1.08 | 7.97E-51  |
| Clu        | -1.08 | 2.33E-34  |
| Mfap5      | -1.11 | 1.42E-41  |
| Sepp1      | -1.16 | 2.59E-51  |
| Fosb       | -1.17 | 1.78E-51  |
| Cdkn1a     | -1.20 | 9.80E-48  |
| Timp3      | -1.23 | 8.48E-70  |
| Nupr1      | -1.28 | 9.01E-53  |
| Apoe       | -1.28 | 4.06E-44  |
| Dcn        | -1.30 | 1.23E-148 |
| Rpl22      | -1.32 | 2.37E-101 |
| Ifi2712a   | -1.41 | 3.71E-53  |
| S100a6     | -1.41 | 1.14E-80  |
| Wif1       | -1.43 | 1.26E-35  |
| Nfkbia     | -1.46 | 5.38E-70  |
| Dpt        | -1.47 | 2.16E-148 |
| Jund       | -1.55 | 7.45E-116 |
| H2-D1      | -1.57 | 4.03E-93  |
| Ifitm3     | -1.61 | 1.08E-90  |

|               |       |           |
|---------------|-------|-----------|
| Prg4          | -1.61 | 2.52E-28  |
| 1500015O10Rik | -1.63 | 3.80E-49  |
| Cfh           | -1.67 | 2.22E-93  |
| Ccdc80        | -1.72 | 5.43E-165 |
| Crispld2      | -1.73 | 3.73E-84  |
| Klf4          | -1.75 | 3.62E-82  |
| Fth1          | -2.10 | 6.01E-264 |
| B2m           | -2.15 | 2.96E-197 |
| Mgp           | -2.26 | 1.24E-122 |
| Malat1        | -2.30 | 0.00E+00  |
| Cst3          | -2.56 | 1.88E-211 |
| mt-Rnr2       | -2.83 | 0.00E+00  |
| Gsn           | -3.30 | 1.41E-319 |

**Table S9:** List of differentially expressed genes (fold > 1.5) between **P7 Col-VIC** and **P7 GAG-VIC**  $p < 0.05$  determined with empirical Bayes moderated t-test.

| GeneID        | Log2fold             | P value              |
|---------------|----------------------|----------------------|
|               | (Col-VIC vs GAG-VIC) | (Col-VIC vs GAG-VIC) |
| Prg4          | 3.60                 | 1.11E-55             |
| Fmod          | 3.26                 | 4.55E-98             |
| Abi3bp        | 3.07                 | 1.07E-78             |
| Sfrp2         | 2.56                 | 7.58E-31             |
| 1500015O10Rik | 2.51                 | 4.97E-56             |
| Prep          | 2.35                 | 1.81E-57             |
| Colla1        | 2.02                 | 6.42E-63             |
| Htra1         | 1.98                 | 1.12E-39             |
| Fibin         | 1.95                 | 1.21E-45             |
| Colla2        | 1.91                 | 1.38E-70             |
| Cfh           | 1.87                 | 2.49E-36             |
| Fbln5         | 1.80                 | 9.35E-36             |
| Thbs1         | 1.77                 | 6.89E-23             |
| Wif1          | 1.70                 | 9.07E-26             |
| Coll1a1       | 1.68                 | 2.08E-38             |
| Gm26771       | 1.51                 | 1.46E-19             |
| Fxyd6         | 1.48                 | 2.02E-27             |
| Cthrc1        | 1.44                 | 2.75E-26             |
| Cyp26a1       | 1.43                 | 2.88E-39             |
| Pamr1         | 1.43                 | 4.04E-31             |
| Mmp2          | 1.39                 | 7.09E-27             |



|                |      |          |
|----------------|------|----------|
| Olfml2b        | 1.36 | 1.63E-24 |
| Col11a2        | 1.31 | 1.59E-28 |
| Aspn           | 1.31 | 4.87E-16 |
| Fbn2           | 1.30 | 4.92E-20 |
| Fos            | 1.30 | 2.43E-14 |
| Matn4          | 1.29 | 1.35E-29 |
| Rin2           | 1.28 | 6.56E-27 |
| Col5a2         | 1.28 | 1.16E-24 |
| Kcnj15         | 1.26 | 2.35E-29 |
| Loxl2          | 1.25 | 1.13E-18 |
| Dkk3           | 1.25 | 2.47E-21 |
| Ctgf           | 1.24 | 1.57E-13 |
| Mfap4          | 1.24 | 5.28E-17 |
| Col9a1         | 1.22 | 9.74E-20 |
| Tgfb1          | 1.19 | 6.51E-21 |
| Klf2           | 1.15 | 3.49E-16 |
| Col5a1         | 1.15 | 3.26E-17 |
| Ltbp2          | 1.13 | 6.99E-25 |
| Timp3          | 1.13 | 1.82E-15 |
| Ogn            | 1.13 | 3.07E-15 |
| Bgn            | 1.09 | 4.41E-24 |
| Meox1          | 1.07 | 2.94E-14 |
| Ecm2           | 1.07 | 2.54E-15 |
| Lox            | 1.06 | 2.07E-15 |
| RP23-103I12.13 | 1.05 | 2.79E-13 |
| Ras11b         | 1.05 | 8.41E-20 |
| Sparc          | 1.04 | 4.04E-40 |
| Comp           | 1.03 | 2.28E-24 |
| Pam            | 1.03 | 1.04E-16 |
| Dcn            | 1.03 | 6.47E-18 |
| Pdgfr1         | 0.99 | 2.13E-15 |
| Col6a2         | 0.97 | 3.07E-14 |
| Fosb           | 0.96 | 2.97E-08 |
| Plod2          | 0.95 | 3.23E-13 |
| Gas1           | 0.93 | 2.07E-12 |
| Angptl7        | 0.93 | 1.48E-20 |
| Cst3           | 0.92 | 2.15E-09 |
| Klf4           | 0.90 | 1.03E-10 |
| Syn3           | 0.86 | 1.55E-08 |
| Picalm         | 0.85 | 3.76E-12 |
| Adamts2        | 0.84 | 1.72E-09 |

|          |      |          |
|----------|------|----------|
| Cyr61    | 0.83 | 1.69E-06 |
| Ssc5d    | 0.83 | 1.19E-16 |
| Col12a1  | 0.83 | 1.03E-11 |
| Chrd11   | 0.83 | 8.52E-20 |
| Palld    | 0.83 | 1.80E-13 |
| Tbx20    | 0.82 | 2.39E-10 |
| Emp1     | 0.81 | 6.40E-10 |
| Serpinf1 | 0.81 | 1.78E-10 |
| Cilp2    | 0.79 | 6.55E-19 |
| Papss2   | 0.77 | 1.87E-13 |
| Srpx2    | 0.77 | 5.72E-18 |
| Gsn      | 0.76 | 3.63E-07 |
| Ptgis    | 0.76 | 6.10E-09 |
| Col6a3   | 0.74 | 6.08E-09 |
| Crispld2 | 0.73 | 6.65E-11 |
| Pmp22    | 0.73 | 1.83E-08 |
| Npy      | 0.73 | 7.57E-09 |
| Meg3     | 0.73 | 2.14E-06 |
| Pkd1     | 0.72 | 7.57E-16 |
| Itgbl1   | 0.72 | 2.01E-19 |
| Grb10    | 0.72 | 8.38E-11 |
| Ctsk     | 0.72 | 9.06E-12 |
| Col6a1   | 0.71 | 3.02E-08 |
| Spats21  | 0.70 | 5.29E-09 |
| Mgp      | 0.70 | 9.19E-05 |
| Pkd2     | 0.69 | 4.81E-09 |
| Timp2    | 0.68 | 1.69E-08 |
| Socs3    | 0.65 | 1.63E-07 |
| Fndc3b   | 0.64 | 3.09E-08 |
| Gm4788   | 0.64 | 4.35E-14 |
| Ddah1    | 0.63 | 7.12E-10 |
| Cfhr2    | 0.63 | 2.14E-15 |
| Nfix     | 0.62 | 9.00E-07 |
| Mpped2   | 0.61 | 5.41E-12 |
| Sat1     | 0.61 | 1.85E-05 |
| Rrbp1    | 0.61 | 2.07E-07 |
| Wwtr1    | 0.61 | 5.24E-07 |
| Jun      | 0.60 | 1.21E-05 |
| Col8a2   | 0.60 | 2.22E-18 |
| Igsf10   | 0.59 | 5.54E-08 |
| Mfap5    | 0.59 | 2.55E-09 |

|            |       |          |
|------------|-------|----------|
| Rps6       | -0.58 | 1.24E-05 |
| Rpl23      | -0.59 | 3.09E-05 |
| Rpl23a     | -0.59 | 3.52E-05 |
| Tmsb10     | -0.59 | 6.70E-05 |
| Klf7       | -0.59 | 2.79E-06 |
| Rps18-ps3  | -0.59 | 8.09E-06 |
| Rpl39      | -0.60 | 0.000184 |
| Rplp1      | -0.60 | 7.87E-05 |
| Rps19      | -0.60 | 2.76E-05 |
| Nrp1       | -0.60 | 1.83E-05 |
| Zeb2       | -0.61 | 6.79E-06 |
| Rpl32      | -0.61 | 3.42E-05 |
| Zfp3611    | -0.62 | 5.09E-05 |
| Daam1      | -0.62 | 6.23E-07 |
| Gm10073    | -0.62 | 5.18E-05 |
| Stxbp6     | -0.63 | 3.87E-12 |
| Gm10335    | -0.63 | 1.94E-05 |
| Cygb       | -0.63 | 1.32E-08 |
| Gucy1a3    | -0.63 | 1.28E-12 |
| Clca1      | -0.64 | 4.35E-10 |
| Rpl23a-ps3 | -0.64 | 1.59E-05 |
| Coll8a1    | -0.65 | 1.27E-11 |
| Kitl       | -0.65 | 3.88E-09 |
| Gm17087    | -0.65 | 1.20E-07 |
| Nfkbiz     | -0.66 | 3.75E-05 |
| Ifitm3     | -0.68 | 1.90E-07 |
| Nid1       | -0.68 | 4.98E-08 |
| Gm10269    | -0.69 | 9.23E-06 |
| Rps29      | -0.70 | 4.91E-07 |
| Spon1      | -0.70 | 1.66E-13 |
| Rpl35      | -0.71 | 1.85E-06 |
| Tagln2     | -0.72 | 1.26E-07 |
| Nes        | -0.73 | 1.08E-09 |
| Dbi        | -0.73 | 2.57E-06 |
| Rps5       | -0.76 | 7.34E-08 |
| Gm2000     | -0.76 | 1.07E-06 |
| Vcan       | -0.88 | 1.36E-08 |
| Co 14a2    | -0.89 | 2.60E-13 |
| Serpine2   | -0.89 | 1.59E-14 |
| Filip11    | -0.90 | 1.79E-09 |
| Lum        | -0.93 | 2.29E-09 |

|        |       |          |
|--------|-------|----------|
| Col4a1 | -0.96 | 9.30E-13 |
| Fkbp1a | -0.98 | 4.56E-13 |
| Fbln2  | -1.03 | 6.31E-14 |
| Nudt4  | -1.04 | 1.69E-15 |
| Ptn    | -1.16 | 1.00E-11 |
| Dclk1  | -1.20 | 7.28E-18 |
| Dpt    | -1.23 | 9.13E-22 |
| Apoe   | -1.40 | 2.56E-14 |
| Map1b  | -1.47 | 5.26E-23 |
| Atp1b1 | -1.61 | 4.70E-31 |
